# Supplementary material for: Low prevalence of influenza A strains with resistance markers in Brazil during 2017–2019 seasons
Source: Front Public Health. 2022 Sep 14;10:944277. doi: 10.3389/fpubh.2022.944277 (PMC9516282; doi:10.3389/fpubh.2022.944277)
Supplement: Supplementary Table 1 — Brazilian IAVs gene sequences data that were included in this study from GISAID EpiFlu platform. [file Table_1.XLSX]

## Sheet: Plan1
Sample	ID GISAID (EPI_ISL_)	Influenza subtype	NA	M2	PA	Brazilian State	GISAID Submitting Lab
A/Brazil/7153/2017	314369	A(H1N1)pdm09	Yes	Yes	Yes	NI	Centers for Disease Control and Prevention
A/Brazil/8285/2017	314368	A(H1N1)pdm09	Yes	Yes	Yes	NI	Centers for Disease Control and Prevention
A/Brazil/4145/2017	314340	A(H1N1)pdm09	Yes	Yes	Yes	NI	Centers for Disease Control and Prevention
A/Minas Gerais/1067/2017	306025	A(H3N2)	Yes	No	No	MG	Centers for Disease Control and Prevention
A/Minas Gerais/1066/2017	306024	A(H3N2)	Yes	No	No	MG	Centers for Disease Control and Prevention
A/Brazil/8164/2017	305834	A(H3N2)	Yes	Yes	Yes	NI	Centers for Disease Control and Prevention
A/Brazil/1967/2017	303259	A(H3N2)	Yes	Yes	Yes	NI	Centers for Disease Control and Prevention
A/Brazil/8285/2017	303258	A(H3N2)	Yes	Yes	Yes	NI	Centers for Disease Control and Prevention
A/Brazil/0485/2017	303219	A(H3N2)	Yes	Yes	Yes	NI	Centers for Disease Control and Prevention
A/Brazil/7153/2017	314369	A(H1N1)pdm09	Yes	Yes	Yes	NI	Centers for Disease Control and Prevention
A/Brazil/8285/2017	314368	A(H1N1)pdm09	Yes	Yes	Yes	NI	Centers for Disease Control and Prevention
A/Brazil/4145/2017	314340	A(H1N1)pdm09	Yes	Yes	Yes	NI	Centers for Disease Control and Prevention
A/Minas Gerais/1067/2017	306025	A(H3N2)	Yes	No	No	MG	Instituto Oswaldo Cruz FIOCRUZ - Laboratory of Respiratory Viruses and Measles (LVRS)
A/Minas Gerais/1066/2017	306024	A(H3N2)	Yes	No	No	MG	Instituto Oswaldo Cruz FIOCRUZ - Laboratory of Respiratory Viruses and Measles (LVRS)
A/Brazil/8164/2017	305834	A(H3N2)	Yes	Yes	Yes	NI	Centers for Disease Control and Prevention
A/Brazil/1967/2017	303259	A(H3N2)	Yes	Yes	Yes	NI	Centers for Disease Control and Prevention
A/Brazil/8285/2017	303258	A(H3N2)	Yes	Yes	Yes	NI	Centers for Disease Control and Prevention
A/Brazil/0485/2017	303219	A(H3N2)	Yes	Yes	Yes	NI	Centers for Disease Control and Prevention
A/Brazil/8164/2017	303218	A(H3N2)	Yes	Yes	Yes	NI	Centers for Disease Control and Prevention
A/Brazil/3559/2017	303216	A(H3N2)	Yes	Yes	Yes	NI	Centers for Disease Control and Prevention
A/Brazil/8711/2017	303215	A(H3N2)	Yes	Yes	Yes	NI	Centers for Disease Control and Prevention
A/Brazil/3870/2017	303214	A(H3N2)	Yes	Yes	Yes	NI	Centers for Disease Control and Prevention
A/Brazil/6791/2017	303213	A(H3N2)	Yes	Yes	Yes	NI	Centers for Disease Control and Prevention
A/Brazil/6531/2017	299903	A(H3N2)	Yes	Yes	Yes	NI	Centers for Disease Control and Prevention
A/Minas Gerais/573/2017	299758	A(H3N2)	Yes	No	No	MG	Instituto Oswaldo Cruz FIOCRUZ - Laboratory of Respiratory Viruses and Measles (LVRS)
A/Minas Gerais/623/2017	299755	A(H3N2)	Yes	No	No	MG	Instituto Oswaldo Cruz FIOCRUZ - Laboratory of Respiratory Viruses and Measles (LVRS)
A/Bahia/861/2017	299754	A(H3N2)	Yes	No	No	BA	Instituto Oswaldo Cruz FIOCRUZ - Laboratory of Respiratory Viruses and Measles (LVRS)
A/Bahia/672/2017	299753	A(H3N2)	Yes	No	No	BA	Instituto Oswaldo Cruz FIOCRUZ - Laboratory of Respiratory Viruses and Measles (LVRS)
A/Bahia/307/2017	299752	A(H1N1)pdm09	Yes	No	No	BA	Instituto Oswaldo Cruz FIOCRUZ - Laboratory of Respiratory Viruses and Measles (LVRS)
A/Santa Catarina/729/2017	299748	A(H1N1)pdm09	Yes	No	No	SC	Instituto Oswaldo Cruz FIOCRUZ - Laboratory of Respiratory Viruses and Measles (LVRS)
A/Santa Catarina/205/2017	299747	A(H1N1)pdm09	Yes	No	No	SC	Instituto Oswaldo Cruz FIOCRUZ - Laboratory of Respiratory Viruses and Measles (LVRS)
A/Rio Grande do Sul/653/2017	299744	A(H1N1)pdm09	Yes	No	No	RS	Instituto Oswaldo Cruz FIOCRUZ - Laboratory of Respiratory Viruses and Measles (LVRS)
A/Rio Grande do Sul/652/2017	299743	A(H1N1)pdm09	Yes	No	No	RS	Instituto Oswaldo Cruz FIOCRUZ - Laboratory of Respiratory Viruses and Measles (LVRS)
A/Rio Grande do Sul/277/2017	299742	A(H1N1)pdm09	Yes	No	No	RS	Instituto Oswaldo Cruz FIOCRUZ - Laboratory of Respiratory Viruses and Measles (LVRS)
A/Parana/713/2017	299740	A(H1N1)pdm09	Yes	No	No	PR	Instituto Oswaldo Cruz FIOCRUZ - Laboratory of Respiratory Viruses and Measles (LVRS)
A/Minas Gerais/570/2017	299738	A(H1N1)pdm09	Yes	No	No	MG	Instituto Oswaldo Cruz FIOCRUZ - Laboratory of Respiratory Viruses and Measles (LVRS)
A/Minas Gerais/569/2017	299737	A(H1N1)pdm09	Yes	No	No	MG	Instituto Oswaldo Cruz FIOCRUZ - Laboratory of Respiratory Viruses and Measles (LVRS)
A/Bahia/674/2017	299735	A(H3N2)	Yes	No	No	BA	Instituto Oswaldo Cruz FIOCRUZ - Laboratory of Respiratory Viruses and Measles (LVRS)
A/Rio Grande Do Sul/663/2017	291644	A(H3N2)	Yes	Yes	Yes	RS	Centers for Disease Control and Prevention
A/Rio De Janeiro/927/2017	291643	A(H3N2)	Yes	Yes	Yes	RJ	Centers for Disease Control and Prevention
A/Parana/929/2017	291642	A(H3N2)	Yes	Yes	Yes	PR	Centers for Disease Control and Prevention
A/Brazil/9896/2017	283329	A(H3N2)	Yes	Yes	Yes	NI	Centers for Disease Control and Prevention
A/Brazil/7516/2017	283328	A(H1N1)pdm09	Yes	Yes	Yes	NI	Centers for Disease Control and Prevention
A/Brazil/482/2017	283327	A(H1N1)pdm09	Yes	Yes	No	PR	Centers for Disease Control and Prevention
A/Brazil/449/2017	283326	A(H1N1)pdm09	Yes	Yes	Yes	SC	Centers for Disease Control and Prevention
A/Brazil/4097/2017	283325	A(H1N1)pdm09	Yes	Yes	Yes	NI	Centers for Disease Control and Prevention
A/Brazil/9114/2017	282865	A(H3N2)	Yes	Yes	Yes	NI	Centers for Disease Control and Prevention
A/Brazil/9849/2017	282864	A(H3N2)	Yes	Yes	Yes	NI	Centers for Disease Control and Prevention
A/Brazil/2128/2017	282863	A(H3N2)	Yes	Yes	Yes	NI	Centers for Disease Control and Prevention
A/Brazil/6863/2017	282862	A(H1N1)pdm09	Yes	Yes	No	NI	Centers for Disease Control and Prevention
A/Brazil/5026/2017	281608	A(H1N1)pdm09	Yes	Yes	Yes	NI	Centers for Disease Control and Prevention
A/Brazil/7516/2017	281545	A(H1N1)pdm09	Yes	Yes	Yes	NI	Centers for Disease Control and Prevention
A/Brazil/8298/2017	281544	A(H1N1)pdm09	Yes	Yes	Yes	NI	Centers for Disease Control and Prevention
A/Brazil/9896/2017	281543	A(H1N1)pdm09	Yes	Yes	Yes	NI	Centers for Disease Control and Prevention
A/Brazil/9098/2017	281542	A(H3N2)	Yes	Yes	Yes	NI	Centers for Disease Control and Prevention
A/Pernambuco/146140-IEC/2017	281524	A(H3N2)	Yes	Yes	Yes	PE	Centers for Disease Control and Prevention
A/Rio Grande Do Norte/146385-IEC/2017	277207	A(H1N1)pdm09	Yes	Yes	Yes	RN	Centers for Disease Control and Prevention
A/Amapa/146988-IEC/2017	277206	A(H1N1)pdm09	Yes	Yes	Yes	AP	Centers for Disease Control and Prevention
A/Amapa/146414-IEC/2017	277205	A(H1N1)pdm09	Yes	Yes	Yes	AP	Centers for Disease Control and Prevention
A/Brazil/400/2017	277140	A(H3N2)	Yes	Yes	Yes	SC	Centers for Disease Control and Prevention
A/Roraima/147244-IEC/2017	275386	A(H1N1)pdm09	Yes	No	No	RR	Evandro Chagas Institute
A/Roraima/146112-IEC/2017	275385	A(H1N1)pdm09	Yes	No	No	RR	Evandro Chagas Institute
A/Rio_Grande_do_Norte/146564-IEC/2017	275384	A(H1N1)pdm09	Yes	No	No	RN	Evandro Chagas Institute
A/Rio_Grande_do_Norte/146385-IEC/2017	275383	A(H3N2)	Yes	No	No	RN	Evandro Chagas Institute
A/Rio_Grande_do_Norte/145641-IEC/2017	275382	A(H3N2)	Yes	No	No	RN	Evandro Chagas Institute
A/Pernambuco/147504-IEC/2017	275380	A(H3N2)	Yes	No	No	PE	Evandro Chagas Institute
A/Pernambuco/147100-IEC/2017	275377	A(H3N2)	Yes	No	No	PE	Evandro Chagas Institute
A/Pernambuco/147098-IEC/2017	275376	A(H3N2)	Yes	No	No	PE	Evandro Chagas Institute
A/Pernambuco/147090-IEC/2017	275375	A(H3N2)	Yes	No	No	PE	Evandro Chagas Institute
A/Pernambuco/146143-IEC/2017	275374	A(H3N2)	Yes	No	No	PE	Evandro Chagas Institute
A/Pernambuco/146140-IEC/2017	275373	A(H3N2)	Yes	No	No	PE	Evandro Chagas Institute
A/Pernambuco/146138-IEC/2017	275372	A(H3N2)	Yes	No	No	PE	Evandro Chagas Institute
A/Pernambuco/145845-IEC/2017	275371	A(H3N2)	Yes	No	No	PE	Evandro Chagas Institute
A/Pernambuco/145840-IEC/2017	275369	A(H3N2)	Yes	No	No	PE	Evandro Chagas Institute
A/Paraiba/147362-IEC/2017	275367	A(H3N2)	Yes	No	No	PB	Evandro Chagas Institute
A/Paraiba/147035-IEC/2017	275366	A(H3N2)	Yes	No	No	PB	Evandro Chagas Institute
A/Paraiba/146800-IEC/2017	275365	A(H3N2)	Yes	No	No	PB	Evandro Chagas Institute
A/Paraiba/146408-IEC/2017	275363	A(H3N2)	Yes	No	No	PB	Evandro Chagas Institute
A/Paraiba/146314-IEC/2017	275362	A(H3N2)	Yes	No	No	PB	Evandro Chagas Institute
A/Paraiba/146152-IEC/2017	275360	A(H3N2)	Yes	No	No	PB	Evandro Chagas Institute
A/Paraiba/145960-IEC/2017	275359	A(H3N2)	Yes	No	No	PB	Evandro Chagas Institute
A/Paraiba/145808-IEC/2017	275358	A(H3N2)	Yes	No	No	PB	Evandro Chagas Institute
A/Paraiba/145708-IEC/2017	275357	A(H3N2)	Yes	No	No	PB	Evandro Chagas Institute
A/Para/146006-IEC/2017	275356	A(H3N2)	Yes	No	No	PA	Evandro Chagas Institute
A/Para/145486-IEC/2017	275355	A(H3N2)	Yes	No	No	PA	Evandro Chagas Institute
A/Maranhao/146663-IEC/2017	275354	A(H3N2)	Yes	No	No	MA	Evandro Chagas Institute
A/Ceara/146907-IEC/2017	275353	A(H3N2)	Yes	No	No	CE	Evandro Chagas Institute
A/Ceara/146539-IEC/2017	275352	A(H3N2)	Yes	No	No	CE	Evandro Chagas Institute
A/Ceara/146464-IEC/2017	275351	A(H3N2)	Yes	No	No	CE	Evandro Chagas Institute
A/Ceara/146425-IEC/2017	275350	A(H3N2)	Yes	No	No	CE	Evandro Chagas Institute
A/Ceara/146225-IEC/2017	275349	A(H3N2)	Yes	No	No	CE	Evandro Chagas Institute
A/Ceara/146082-IEC/2017	275348	A(H3N2)	Yes	No	No	CE	Evandro Chagas Institute
A/Ceara/146061-IEC/2017	275347	A(H3N2)	Yes	No	No	CE	Evandro Chagas Institute
A/Ceara/145905-IEC/2017	275346	A(H3N2)	Yes	No	No	CE	Evandro Chagas Institute
A/Ceara/145874-IEC/2017	275345	A(H3N2)	Yes	No	No	CE	Evandro Chagas Institute
A/Ceara/145603-IEC/2017	275344	A(H3N2)	Yes	No	No	CE	Evandro Chagas Institute
A/Ceara/145417-IEC/2017	275343	A(H3N2)	Yes	No	No	CE	Evandro Chagas Institute
A/Amazonas/146293-IEC/2017	275342	A(H1N1)pdm09	Yes	No	No	AM	Evandro Chagas Institute
A/Amazonas/146292-IEC/2017	275341	A(H1N1)pdm09	Yes	No	No	AM	Evandro Chagas Institute
A/Amazonas/145938-IEC/2017	275340	A(H1N1)pdm09	Yes	No	No	AM	Evandro Chagas Institute
A/Amazonas/145756-IEC/2017	275339	A(H1N1)pdm09	Yes	No	No	AM	Evandro Chagas Institute
A/Amazonas/145625-IEC/2017	275338	A(H1N1)pdm09	Yes	No	No	AM	Evandro Chagas Institute
A/Amazonas/145492-IEC/2017	275337	A(H1N1)pdm09	Yes	No	No	AM	Evandro Chagas Institute
A/Amapa/146988-IEC/2017	275336	A(H1N1)pdm09	Yes	No	No	AP	Evandro Chagas Institute
A/Amapa/146721-IEC/2017	275335	A(H1N1)pdm09	Yes	No	No	AP	Evandro Chagas Institute
A/Amapa/146419-IEC/2017	275334	A(H1N1)pdm09	Yes	No	No	AP	Evandro Chagas Institute
A/Amapa/146418-IEC/2017	275333	A(H1N1)pdm09	Yes	No	No	AP	Evandro Chagas Institute
A/Amapa/146414-IEC/2017	275332	A(H1N1)pdm09	Yes	No	No	AP	Evandro Chagas Institute
A/Amapa/145955-IEC/2017	275331	A(H1N1)pdm09	Yes	No	No	AP	Evandro Chagas Institute
A/Acre/146962-IEC/2017	275329	A(H1N1)pdm09	Yes	No	No	AC	Evandro Chagas Institute
A/Acre/146639-IEC/2017	275328	A(H1N1)pdm09	Yes	No	No	AC	Evandro Chagas Institute
A/Acre/146627-IEC/2017	275327	A(H1N1)pdm09	Yes	No	No	AC	Evandro Chagas Institute
A/Acre/146382-IEC/2017	275326	A(H1N1)pdm09	Yes	No	No	AC	Evandro Chagas Institute
A/Acre/145969-IEC/2017	275325	A(H1N1)pdm09	Yes	No	No	AC	Evandro Chagas Institute
A/Acre/145968-IEC/2017	275324	A(H1N1)pdm09	Yes	No	No	AC	Evandro Chagas Institute
A/Parana/34/2017	275322	A(H1N1)pdm09	Yes	No	No	PR	Instituto Oswaldo Cruz FIOCRUZ - Laboratory of Respiratory Viruses and Measles (LVRS)
A/Espirito Santo/58/2017	275321	A(H1N1)pdm09	Yes	No	No	ES	Instituto Oswaldo Cruz FIOCRUZ - Laboratory of Respiratory Viruses and Measles (LVRS)
A/Santa Catarina/143/2017	275320	A(H1N1)pdm09	Yes	No	No	SC	Instituto Oswaldo Cruz FIOCRUZ - Laboratory of Respiratory Viruses and Measles (LVRS)
A/Sergipe/171/2017	275319	A(H1N1)pdm09	Yes	No	No	SE	Instituto Oswaldo Cruz FIOCRUZ - Laboratory of Respiratory Viruses and Measles (LVRS)
A/Santa Catarina/208/2017	275318	A(H1N1)pdm09	Yes	No	No	SC	Instituto Oswaldo Cruz FIOCRUZ - Laboratory of Respiratory Viruses and Measles (LVRS)
A/Santa Catarina/454/2017	275317	A(H1N1)pdm09	Yes	No	No	SC	Instituto Oswaldo Cruz FIOCRUZ - Laboratory of Respiratory Viruses and Measles (LVRS)
A/Santa Catarina/453/2017	275316	A(H1N1)pdm09	Yes	No	No	SC	Instituto Oswaldo Cruz FIOCRUZ - Laboratory of Respiratory Viruses and Measles (LVRS)
A/Santa Catarina/452/2017	275315	A(H1N1)pdm09	Yes	No	No	SC	Instituto Oswaldo Cruz FIOCRUZ - Laboratory of Respiratory Viruses and Measles (LVRS)
A/Santa Catarina/451/2017	275314	A(H1N1)pdm09	Yes	No	No	SC	Instituto Oswaldo Cruz FIOCRUZ - Laboratory of Respiratory Viruses and Measles (LVRS)
A/Parana/725/2017	275312	A(H1N1)pdm09	Yes	No	No	PR	Instituto Oswaldo Cruz FIOCRUZ - Laboratory of Respiratory Viruses and Measles (LVRS)
A/Parana/722/2017	275310	A(H1N1)pdm09	Yes	No	No	PR	Instituto Oswaldo Cruz FIOCRUZ - Laboratory of Respiratory Viruses and Measles (LVRS)
A/Parana/718/2017	275308	A(H1N1)pdm09	Yes	No	No	PR	Instituto Oswaldo Cruz FIOCRUZ - Laboratory of Respiratory Viruses and Measles (LVRS)
A/Parana/717/2017	275307	A(H1N1)pdm09	Yes	No	No	PR	Instituto Oswaldo Cruz FIOCRUZ - Laboratory of Respiratory Viruses and Measles (LVRS)
A/Minas Gerais/699/2017	275306	A(H1N1)pdm09	Yes	No	No	MG	Instituto Oswaldo Cruz FIOCRUZ - Laboratory of Respiratory Viruses and Measles (LVRS)
A/Minas Gerais/626/2017	275305	A(H1N1)pdm09	Yes	No	No	MG	Instituto Oswaldo Cruz FIOCRUZ - Laboratory of Respiratory Viruses and Measles (LVRS)
A/Minas Gerais/625/2017	275304	A(H1N1)pdm09	Yes	No	No	MG	Instituto Oswaldo Cruz FIOCRUZ - Laboratory of Respiratory Viruses and Measles (LVRS)
A/Espirito Santo/500/2017	275300	A(H1N1)pdm09	Yes	No	No	ES	Instituto Oswaldo Cruz FIOCRUZ - Laboratory of Respiratory Viruses and Measles (LVRS)
A/Parana/487/2017	275297	A(H1N1)pdm09	Yes	No	No	PR	Instituto Oswaldo Cruz FIOCRUZ - Laboratory of Respiratory Viruses and Measles (LVRS)
A/Parana/484/2017	275296	A(H1N1)pdm09	Yes	No	No	PR	Instituto Oswaldo Cruz FIOCRUZ - Laboratory of Respiratory Viruses and Measles (LVRS)
A/Santa Catarina/455/2017	275293	A(H1N1)pdm09	Yes	No	No	SC	Instituto Oswaldo Cruz FIOCRUZ - Laboratory of Respiratory Viruses and Measles (LVRS)
A/Rio Grande do Sul/671/2017	275292	A(H1N1)pdm09	Yes	No	No	RS	Instituto Oswaldo Cruz FIOCRUZ - Laboratory of Respiratory Viruses and Measles (LVRS)
A/Rio Grande do Sul/667/2017	275291	A(H1N1)pdm09	Yes	No	No	RS	Instituto Oswaldo Cruz FIOCRUZ - Laboratory of Respiratory Viruses and Measles (LVRS)
A/Rio Grande do Sul/661/2017	275289	A(H1N1)pdm09	Yes	No	No	RS	Instituto Oswaldo Cruz FIOCRUZ - Laboratory of Respiratory Viruses and Measles (LVRS)
A/Minas Gerais/66/2017	274661	A(H1N1)pdm09	Yes	No	No	MG	Instituto Oswaldo Cruz FIOCRUZ - Laboratory of Respiratory Viruses and Measles (LVRS)
A/Parana/340/2017	274655	A(H1N1)pdm09	Yes	No	No	PR	Instituto Oswaldo Cruz FIOCRUZ - Laboratory of Respiratory Viruses and Measles (LVRS)
A/Rio Grande do Sul/286/2017	274653	A(H1N1)pdm09	Yes	No	No	RS	Instituto Oswaldo Cruz FIOCRUZ - Laboratory of Respiratory Viruses and Measles (LVRS)
A/Sergipe/251/2017	274651	A(H1N1)pdm09	Yes	No	No	SE	Instituto Oswaldo Cruz FIOCRUZ - Laboratory of Respiratory Viruses and Measles (LVRS)
A/Ceara/146075-IEC/2017	273326	A(H1N1)pdm09	Yes	No	No	CE	Evandro Chagas Institute
A/Ceara/145605-IEC/2017	273307	A(H1N1)pdm09	Yes	No	No	CE	Evandro Chagas Institute
A/Ceara/146075-IEC/2017	273306	A(H1N1)pdm09	Yes	No	No	CE	Evandro Chagas Institute
A/Rio De Janeiro/76/2017	272924	A(H1N1)pdm09	Yes	Yes	Yes	RJ	Centers for Disease Control and Prevention
A/Bahia/133/2017	268463	A(H3N2)	Yes	Yes	Yes	BA	Centers for Disease Control and Prevention
A/Santa Catarina/92/2017	268417	A(H3N2)	Yes	Yes	Yes	SC	Centers for Disease Control and Prevention
A/Rio Grande Do Sul/17/2017	268414	A(H3N2)	Yes	Yes	Yes	RS	Centers for Disease Control and Prevention
A/Santa Catarina/209/2017	268351	A(H3N2)	Yes	Yes	Yes	SC	Centers for Disease Control and Prevention
A/Alagoas/191/2017	268350	A(H1N1)pdm09	Yes	Yes	Yes	AL	Centers for Disease Control and Prevention
A/Parana/157/2017	268349	A(H1N1)pdm09	Yes	Yes	Yes	PR	Centers for Disease Control and Prevention
A/Parana/152/2017	268348	A(H1N1)pdm09	Yes	Yes	Yes	PR	Centers for Disease Control and Prevention
A/Santa Catarina/141/2017	268347	A(H3N2)	Yes	Yes	Yes	SC	Centers for Disease Control and Prevention
A/Bahia/130/2017	268346	A(H3N2)	Yes	Yes	Yes	BA	Centers for Disease Control and Prevention
A/Santa Catarina/121/2017	268345	A(H3N2)	Yes	Yes	Yes	SC	Centers for Disease Control and Prevention
A/Parana/99/2017	268344	A(H1N1)pdm09	Yes	Yes	Yes	PR	Centers for Disease Control and Prevention
A/Minas Gerais/66/2017	268343	A(H1N1)pdm09	Yes	Yes	Yes	MG	Centers for Disease Control and Prevention
A/Roraima/149002-IEC/2017	314564	A(H3N2)	Yes	No	No	RR	Evandro Chagas Institute
A/Roraima/148610-IEC/2017	314563	A(H1N1)pdm09	Yes	No	No	RR	Evandro Chagas Institute
A/Pernambuco/148978-IEC/2017	314560	A(H1N1)pdm09	Yes	No	No	PE	Evandro Chagas Institute
A/Pernambuco/148403-IEC/2017	314559	A(H1N1)pdm09	Yes	No	No	PE	Evandro Chagas Institute
A/Espirito Santo/619/2017	300394	A(H1N1)pdm09	Yes	Yes	Yes	ES	WHO Collaborating Centre for Reference and Research on Influenza
A/Parana/490/2017	300393	A(H1N1)pdm09	Yes	Yes	Yes	PR	WHO Collaborating Centre for Reference and Research on Influenza
A/Rio Grande do Sul/287/2017	300392	A(H1N1)pdm09	Yes	Yes	Yes	RS	WHO Collaborating Centre for Reference and Research on Influenza
A/Santa Catarina/455/2017	300391	A(H1N1)pdm09	Yes	Yes	Yes	SC	WHO Collaborating Centre for Reference and Research on Influenza
A/Santa Catarina/142/2017	300388	A(H1N1)pdm09	Yes	Yes	Yes	SC	WHO Collaborating Centre for Reference and Research on Influenza
A/Minas Gerais/594/2017	300387	A(H1N1)pdm09	Yes	Yes	Yes	MG	WHO Collaborating Centre for Reference and Research on Influenza
A/Santa Catarina/737/2017	304985	A(H1N1)pdm09	Yes	Yes	Yes	SC	Centers for Disease Control and Prevention
A/Santa Catarina/918/2017	292525	A(H1N1)pdm09	Yes	Yes	Yes	SC	Centers for Disease Control and Prevention
A/Santa Catarina/918/2017	292524	A(H1N1)pdm09	Yes	Yes	Yes	SC	Centers for Disease Control and Prevention
A/Santa Catarina/737/2017	292523	A(H1N1)pdm09	Yes	Yes	Yes	SC	Centers for Disease Control and Prevention
A/Parana/727/2017	292522	A(H1N1)pdm09	Yes	Yes	Yes	PR	Centers for Disease Control and Prevention
A/Brazil/529/2017	275889	A(H1N1)pdm09	Yes	Yes	Yes	MG	Centers for Disease Control and Prevention
A/Brazil/492/2017	275887	A(H1N1)pdm09	Yes	Yes	Yes	PR	Centers for Disease Control and Prevention
A/Brazil/491/2017	275885	A(H1N1)pdm09	Yes	Yes	Yes	PR	Centers for Disease Control and Prevention
A/Brazil/486/2017	275883	A(H1N1)pdm09	Yes	Yes	Yes	PR	Centers for Disease Control and Prevention
A/Brazil/482/2017	275881	A(H1N1)pdm09	Yes	Yes	Yes	PR	Centers for Disease Control and Prevention
A/Brazil/479/2017	275879	A(H1N1)pdm09	Yes	Yes	Yes	SC	Centers for Disease Control and Prevention
A/Brazil/478/2017	275877	A(H1N1)pdm09	Yes	Yes	Yes	SC	Centers for Disease Control and Prevention
A/Brazil/475/2017	275875	A(H3N2)	Yes	Yes	Yes	SC	Centers for Disease Control and Prevention
A/Brazil/474/2017	275873	A(H3N2)	Yes	Yes	Yes	SC	Centers for Disease Control and Prevention
A/Brazil/449/2017	275871	A(H3N2)	Yes	Yes	Yes	SC	Centers for Disease Control and Prevention
A/Brazil/399/2017	275869	A(H3N2)	Yes	Yes	Yes	SC	Centers for Disease Control and Prevention
A/Brazil/358/2017	275868	A(H3N2)	Yes	Yes	No	ES	Centers for Disease Control and Prevention
A/Brazil/347/2017	275867	A(H3N2)	Yes	Yes	Yes	PR	Centers for Disease Control and Prevention
A/Brazil/339/2017	275866	A(H3N2)	Yes	Yes	Yes	PR	Centers for Disease Control and Prevention
A/Brazil/321/2017	275865	A(H3N2)	Yes	Yes	Yes	RJ	Centers for Disease Control and Prevention
A/Brazil/319/2017	275864	A(H3N2)	Yes	Yes	Yes	SE	Centers for Disease Control and Prevention
A/Brazil/291/2017	275862	A(H3N2)	Yes	Yes	Yes	RS	Centers for Disease Control and Prevention
A/Brazil/284/2017	275860	A(H3N2)	Yes	Yes	Yes	RS	Centers for Disease Control and Prevention
A/Brazil/283/2017	275857	A(H3N2)	Yes	Yes	Yes	RS	Centers for Disease Control and Prevention
A/Brazil/536/2017	275661	A(H3N2)	Yes	Yes	Yes	MG	Centers for Disease Control and Prevention
A/Brazil/526/2017	275660	A(H1N1)pdm09	Yes	Yes	Yes	MG	Centers for Disease Control and Prevention
A/Parana/157/2017	273624	A(H1N1)pdm09	Yes	Yes	Yes	PR	Centers for Disease Control and Prevention
A/Bahia/130/2017	273623	A(H1N1)pdm09	Yes	Yes	Yes	BA	Centers for Disease Control and Prevention
A/Parana/99/2017	273622	A(H1N1)pdm09	Yes	Yes	Yes	PR	Centers for Disease Control and Prevention
A/Roraima/148126-IEC/2017	275841	A(H1N1)pdm09	Yes	Yes	Yes	RR	Centers for Disease Control and Prevention
A/Roraima/148122-IEC/2017	275839	A(H1N1)pdm09	Yes	Yes	Yes	RR	Centers for Disease Control and Prevention
A/Paraiba/147746-IEC/2017	275837	A(H1N1)pdm09	Yes	Yes	Yes	PB	Centers for Disease Control and Prevention
A/Pernambuco/147504-IEC/2017	275835	A(H1N1)pdm09	Yes	Yes	Yes	PE	Centers for Disease Control and Prevention
A/Roraima/147244-IEC/2017	275833	A(H1N1)pdm09	Yes	Yes	Yes	RR	Centers for Disease Control and Prevention
A/Acre/146845-IEC/2017	275831	A(H1N1)pdm09	Yes	Yes	Yes	AC	Centers for Disease Control and Prevention
A/Paraiba/146792-IEC/2017	275829	A(H1N1)pdm09	Yes	Yes	Yes	PB	Centers for Disease Control and Prevention
A/Roraima/146724-IEC/2017	275827	A(H3N2)	Yes	Yes	Yes	RR	Centers for Disease Control and Prevention
A/Maranhao/146663-IEC/2017	275825	A(H3N2)	Yes	Yes	Yes	MA	Centers for Disease Control and Prevention
A/Acre/146639-IEC/2017	275823	A(H3N2)	Yes	Yes	Yes	AC	Centers for Disease Control and Prevention
A/Ceara/146225-IEC/2017	275821	A(H3N2)	Yes	Yes	Yes	CE	Centers for Disease Control and Prevention
A/Pernambuco/146140-IEC/2017	275819	A(H3N2)	Yes	Yes	Yes	PE	Centers for Disease Control and Prevention
A/Ceara/145874-IEC/2017	275817	A(H3N2)	Yes	Yes	Yes	CE	Centers for Disease Control and Prevention
A/Pernambuco/145843-IEC/2017	275815	A(H3N2)	Yes	Yes	Yes	PE	Centers for Disease Control and Prevention
A/Amazonas/145756-IEC/2017	275813	A(H3N2)	Yes	Yes	Yes	AM	Centers for Disease Control and Prevention
A/Rio Grande Do Norte/145641-IEC/2017	275811	A(H3N2)	Yes	Yes	Yes	RN	Centers for Disease Control and Prevention
A/Ceara/145603-IEC/2017	275810	A(H3N2)	Yes	Yes	Yes	CE	Centers for Disease Control and Prevention
A/Amazonas/145492-IEC/2017	275808	A(H3N2)	Yes	Yes	Yes	AM	Centers for Disease Control and Prevention
A/Para/145486-IEC/2017	275807	A(H3N2)	Yes	Yes	Yes	PA	Centers for Disease Control and Prevention
A/Ceara/145605-IEC/2017	275655	A(H3N2)	Yes	Yes	Yes	CE	Centers for Disease Control and Prevention
A/Brazil/1445/2017	315009	A(H3N2)	Yes	Yes	Yes	NI	Centers for Disease Control and Prevention
A/Brazil/1445/2017	303094	A(H3N2)	Yes	Yes	Yes	NI	Centers for Disease Control and Prevention
A/Brazil/4729/2017	303087	A(H3N2)	Yes	Yes	Yes	NI	Centers for Disease Control and Prevention
A/Brazil/5769/2017	300758	A(H1N1)pdm09	Yes	Yes	Yes	NI	Centers for Disease Control and Prevention
A/Brazil/4558/2017	300755	A(H1N1)pdm09	Yes	Yes	Yes	NI	Centers for Disease Control and Prevention
A/Brazil/8610/2017	275742	A(H1N1)pdm09	Yes	Yes	Yes	NI	Centers for Disease Control and Prevention
A/Brazil/9114/2017	275741	A(H3N2)	Yes	Yes	Yes	NI	Centers for Disease Control and Prevention
A/Brazil/5950/2017	275740	A(H3N2)	Yes	Yes	Yes	NI	Centers for Disease Control and Prevention
A/Brazil/9849/2017	275739	A(H3N2)	Yes	Yes	Yes	NI	Centers for Disease Control and Prevention
A/Brazil/2128/2017	275738	A(H3N2)	Yes	Yes	Yes	NI	Centers for Disease Control and Prevention
A/Brazil/1770/2017	275737	A(H3N2)	Yes	Yes	Yes	NI	Centers for Disease Control and Prevention
A/Brazil/6863/2017	275736	A(H3N2)	Yes	Yes	Yes	NI	Centers for Disease Control and Prevention
A/Brazil/4385/2017	275735	A(H3N2)	Yes	Yes	Yes	NI	Centers for Disease Control and Prevention
A/Brazil/9512/2017	275734	A(H3N2)	Yes	Yes	Yes	NI	Centers for Disease Control and Prevention
A/Brazil/8931/2017	273697	A(H3N2)	Yes	Yes	Yes	NI	Centers for Disease Control and Prevention
A/Minas Gerais/701/2017	275627	A(H3N2)	Yes	No	No	MG	Instituto Oswaldo Cruz FIOCRUZ - Laboratory of Respiratory Viruses and Measles (LVRS)
A/Minas Gerais/700/2017	275621	A(H1N1)pdm09	Yes	No	No	MG	Instituto Oswaldo Cruz FIOCRUZ - Laboratory of Respiratory Viruses and Measles (LVRS)
A/Minas Gerais/67/2017	274165	A(H1N1)pdm09	Yes	No	No	MG	Instituto Oswaldo Cruz FIOCRUZ - Laboratory of Respiratory Viruses and Measles (LVRS)
A/Rio de Janeiro/1008/2017	306366	A(H1N1)pdm09	Yes	No	No	RJ	Instituto Oswaldo Cruz FIOCRUZ - Laboratory of Respiratory Viruses and Measles (LVRS)
A/Rio de Janeiro/332/2017	274153	A(H1N1)pdm09	Yes	No	No	RJ	Instituto Oswaldo Cruz FIOCRUZ - Laboratory of Respiratory Viruses and Measles (LVRS)
A/Santa Catarina/122/2017	274159	A(H1N1)pdm09	Yes	No	No	SC	Instituto Oswaldo Cruz FIOCRUZ - Laboratory of Respiratory Viruses and Measles (LVRS)
A/Parana/727/2017	275628	A(H1N1)pdm09	Yes	No	No	PR	Instituto Oswaldo Cruz FIOCRUZ - Laboratory of Respiratory Viruses and Measles (LVRS)
A/Parana/489/2017	275625	A(H1N1)pdm09	Yes	No	No	PR	Instituto Oswaldo Cruz FIOCRUZ - Laboratory of Respiratory Viruses and Measles (LVRS)
A/Parana/724/2017	275623	A(H3N2)	Yes	No	No	PR	Instituto Oswaldo Cruz FIOCRUZ - Laboratory of Respiratory Viruses and Measles (LVRS)
A/Parana/726/2017	275622	A(H3N2)	Yes	No	No	PR	Instituto Oswaldo Cruz FIOCRUZ - Laboratory of Respiratory Viruses and Measles (LVRS)
A/Parana/98/2017	274176	A(H3N2)	Yes	No	No	PR	Instituto Oswaldo Cruz FIOCRUZ - Laboratory of Respiratory Viruses and Measles (LVRS)
A/Parana/95/2017	274175	A(H3N2)	Yes	No	No	PR	Instituto Oswaldo Cruz FIOCRUZ - Laboratory of Respiratory Viruses and Measles (LVRS)
A/Parana/348/2017	274173	A(H3N2)	Yes	No	No	PR	Instituto Oswaldo Cruz FIOCRUZ - Laboratory of Respiratory Viruses and Measles (LVRS)
A/Parana/235/2017	274170	A(H3N2)	Yes	No	No	PR	Instituto Oswaldo Cruz FIOCRUZ - Laboratory of Respiratory Viruses and Measles (LVRS)
A/Parana/228/2017	274169	A(H3N2)	Yes	No	No	PR	Instituto Oswaldo Cruz FIOCRUZ - Laboratory of Respiratory Viruses and Measles (LVRS)
A/Santa Catarina/202/2017	274266	A(H3N2)	Yes	No	No	SC	Instituto Oswaldo Cruz FIOCRUZ - Laboratory of Respiratory Viruses and Measles (LVRS)
A/Rio Grande do Sul/274/2017	274179	A(H3N2)	Yes	No	No	RS	Instituto Oswaldo Cruz FIOCRUZ - Laboratory of Respiratory Viruses and Measles (LVRS)
A/Sergipe/212/2017	274184	A(H3N2)	Yes	No	No	SE	Instituto Oswaldo Cruz FIOCRUZ - Laboratory of Respiratory Viruses and Measles (LVRS)
A/Bahia/132/2017	274161	A(H3N2)	Yes	No	No	BA	Instituto Oswaldo Cruz FIOCRUZ - Laboratory of Respiratory Viruses and Measles (LVRS)
A/Espirito Santo/505/2017	275626	A(H3N2)	Yes	No	No	ES	Instituto Oswaldo Cruz FIOCRUZ - Laboratory of Respiratory Viruses and Measles (LVRS)
A/Espirito Santo/60/2017	274164	A(H3N2)	Yes	No	No	ES	Instituto Oswaldo Cruz FIOCRUZ - Laboratory of Respiratory Viruses and Measles (LVRS)
A/Espirito Santo/355/2017	274163	A(H3N2)	Yes	No	No	ES	Instituto Oswaldo Cruz FIOCRUZ - Laboratory of Respiratory Viruses and Measles (LVRS)
A/Espirito Santo/174/2017	274162	A(H3N2)	Yes	No	No	ES	Instituto Oswaldo Cruz FIOCRUZ - Laboratory of Respiratory Viruses and Measles (LVRS)
A/Pernambuco/9511/2018	506165	A(H3N2)	Yes	Yes	Yes	PE	NI
A/Parana/1081/2018	338732	A(H3N2)	Yes	Yes	Yes	PR	Centers for Disease Control and Prevention
A/Rio De Janeiro/970/2018	338731	A(H3N2)	Yes	Yes	Yes	RJ	Centers for Disease Control and Prevention
A/Brazil/6494/2018	333860	A(H3N2)	Yes	Yes	Yes	NI	Centers for Disease Control and Prevention
A/Brazil/8380/2018	333859	A(H3N2)	Yes	Yes	Yes	NI	Centers for Disease Control and Prevention
A/Brazil/9555/2018	333856	A(H1N1)pdm09	Yes	Yes	Yes	NI	Centers for Disease Control and Prevention
A/Brazil/8169/2018	333855	A(H1N1)pdm09	Yes	Yes	Yes	NI	Centers for Disease Control and Prevention
A/Brazil/823713/2018	332317	A(H1N1)pdm09	Yes	Yes	Yes	NI	Centers for Disease Control and Prevention
A/Brazil/1658/2018	332314	A(H1N1)pdm09	Yes	Yes	Yes	NI	Centers for Disease Control and Prevention
A/Bahia/956/2018	332313	A(H1N1)pdm09	Yes	Yes	Yes	BA	Centers for Disease Control and Prevention
A/Espirito Santo/737/2018	332311	A(H1N1)pdm09	Yes	Yes	Yes	ES	Centers for Disease Control and Prevention
A/Brazil/7331/2018	332309	A(H1N1)pdm09	Yes	Yes	Yes	NI	Centers for Disease Control and Prevention
A/Brazil/0020/2018	332308	A(H1N1)pdm09	Yes	Yes	Yes	NI	Centers for Disease Control and Prevention
A/Brazil/1469/2018	332007	A(H1N1)pdm09	Yes	Yes	Yes	NI	Centers for Disease Control and Prevention
A/Brazil/2135/2018	332006	A(H1N1)pdm09	Yes	Yes	Yes	NI	Centers for Disease Control and Prevention
A/Brazil/6279/2018	330885	A(H1N1)pdm09	Yes	Yes	Yes	NI	Centers for Disease Control and Prevention
A/Espirito Santo/1191/2018	330881	A(H1N1)pdm09	Yes	Yes	Yes	ES	Centers for Disease Control and Prevention
A/Espirito Santo/1192/2018	330880	A(H1N1)pdm09	Yes	Yes	Yes	ES	Centers for Disease Control and Prevention
A/Parana/1042/2018	330870	A(H1N1)pdm09	Yes	Yes	Yes	PR	Centers for Disease Control and Prevention
A/Parana/1041/2018	330869	A(H1N1)pdm09	Yes	Yes	Yes	PR	Centers for Disease Control and Prevention
A/Parana/1072/2018	330867	A(H1N1)pdm09	Yes	Yes	Yes	PR	Centers for Disease Control and Prevention
A/Parana/1071/2018	330865	A(H1N1)pdm09	Yes	Yes	Yes	PR	Centers for Disease Control and Prevention
A/Espirito Santo/1184/2018	330473	A(H1N1)pdm09	Yes	Yes	Yes	ES	Centers for Disease Control and Prevention
A/Parana/1169/2018	330472	A(H1N1)pdm09	Yes	Yes	Yes	PR	Centers for Disease Control and Prevention
A/Espirito Santo/1189/2018	330471	A(H1N1)pdm09	Yes	Yes	No	ES	Centers for Disease Control and Prevention
A/Parana/1171/2018	330470	A(H1N1)pdm09	Yes	Yes	Yes	PR	Centers for Disease Control and Prevention
A/Brazil/3018/2018	330451	A(H1N1)pdm09	Yes	Yes	Yes	NI	Centers for Disease Control and Prevention
A/Rio De Janeiro/876/2018	330449	A(H1N1)pdm09	Yes	Yes	No	RJ	Centers for Disease Control and Prevention
A/Parana/1080/2018	330437	A(H3N2)	Yes	Yes	Yes	PR	Centers for Disease Control and Prevention
A/Brazil/0805/2018	330436	A(H3N2)	Yes	Yes	Yes	NI	Centers for Disease Control and Prevention
A/Parana/1036/2018	330435	A(H3N2)	Yes	Yes	Yes	PR	Centers for Disease Control and Prevention
A/Brazil/7274/2018	330425	A(H1N1)pdm09	Yes	Yes	Yes	NI	Centers for Disease Control and Prevention
A/Brazil/4449/2018	330419	A(H3N2)	Yes	Yes	Yes	NI	Centers for Disease Control and Prevention
A/Brazil/6340/2018	330411	A(H3N2)	Yes	Yes	Yes	NI	Centers for Disease Control and Prevention
A/Brazil/1456/2018	330410	A(H3N2)	Yes	Yes	Yes	NI	Centers for Disease Control and Prevention
A/Brazil/0382/2018	330406	A(H3N2)	Yes	Yes	Yes	NI	Centers for Disease Control and Prevention
A/Brazil/9006/2018	330404	A(H3N2)	Yes	Yes	Yes	NI	Centers for Disease Control and Prevention
A/Brazil/7331/2018	330288	A(H1N1)pdm09	Yes	Yes	Yes	NI	Centers for Disease Control and Prevention
A/Brazil/4827/2018	330283	A(H3N2)	Yes	Yes	Yes	NI	Centers for Disease Control and Prevention
A/Brazil/4139/2018	330282	A(H3N2)	Yes	Yes	Yes	NI	Centers for Disease Control and Prevention
A/Brazil/9712/2018	330279	A(H1N1)pdm09	Yes	Yes	No	NI	Centers for Disease Control and Prevention
A/Brazil/7180/2018	330276	A(H1N1)pdm09	Yes	Yes	Yes	NI	Centers for Disease Control and Prevention
A/Brazil/8425/2018	330275	A(H1N1)pdm09	Yes	Yes	Yes	NI	Centers for Disease Control and Prevention
A/Brazil/8178/2018	330269	A(H1N1)pdm09	Yes	Yes	Yes	NI	Centers for Disease Control and Prevention
A/Parana/1164/2018	330268	A(H1N1)pdm09	Yes	Yes	Yes	PR	Centers for Disease Control and Prevention
A/Brazil/8341/2018	330267	A(H1N1)pdm09	Yes	Yes	Yes	NI	Centers for Disease Control and Prevention
A/Brazil/5557/2018	330266	A(H1N1)pdm09	Yes	Yes	Yes	NI	Centers for Disease Control and Prevention
A/Brazil/0593/2018	330261	A(H1N1)pdm09	Yes	Yes	Yes	NI	Centers for Disease Control and Prevention
A/Parana/1159/2018	330255	A(H1N1)pdm09	Yes	Yes	Yes	PR	Centers for Disease Control and Prevention
A/Parana/1046/2018	330246	A(H1N1)pdm09	Yes	Yes	Yes	PR	Centers for Disease Control and Prevention
A/Brazil/8539/2018	330201	A(H1N1)pdm09	Yes	Yes	No	NI	Centers for Disease Control and Prevention
A/Brazil/0015/2018	329909	A(H3N2)	Yes	Yes	Yes	NI	Centers for Disease Control and Prevention
A/Brazil/0059/2018	329907	A(H3N2)	Yes	Yes	Yes	NI	Centers for Disease Control and Prevention
A/Brazil/8914/2018	329899	A(H1N1)pdm09	Yes	Yes	Yes	NI	Centers for Disease Control and Prevention
A/Brazil/9204/2018	329896	A(H1N1)pdm09	Yes	Yes	Yes	NI	Centers for Disease Control and Prevention
A/Brazil/4335/2018	329895	A(H3N2)	Yes	Yes	Yes	NI	Centers for Disease Control and Prevention
A/Brazil/6002/2018	329892	A(H1N1)pdm09	Yes	Yes	Yes	NI	Centers for Disease Control and Prevention
A/Brazil/2699/2018	329889	A(H1N1)pdm09	Yes	Yes	Yes	NI	Centers for Disease Control and Prevention
A/Brazil/4519/2018	329888	A(H1N1)pdm09	Yes	Yes	Yes	NI	Centers for Disease Control and Prevention
A/Brazil/1031/2018	329886	A(H3N2)	Yes	Yes	Yes	NI	Centers for Disease Control and Prevention
A/Brazil/1901/2018	329864	A(H3N2)	Yes	Yes	Yes	NI	Centers for Disease Control and Prevention
A/Brazil/8380/2018	329862	A(H1N1)pdm09	Yes	Yes	Yes	NI	Centers for Disease Control and Prevention
A/Brazil/8306/2018	329861	A(H1N1)pdm09	Yes	Yes	Yes	NI	Centers for Disease Control and Prevention
A/Brazil/8415/2018	329860	A(H3N2)	Yes	Yes	Yes	NI	Centers for Disease Control and Prevention
A/Brazil/4623/2018	329859	A(H3N2)	Yes	Yes	Yes	NI	Centers for Disease Control and Prevention
A/Brazil/5866/2018	329858	A(H3N2)	Yes	Yes	Yes	NI	Centers for Disease Control and Prevention
A/Brazil/8341/2018	329857	A(H3N2)	Yes	Yes	Yes	NI	Centers for Disease Control and Prevention
A/Brazil/6494/2018	329855	A(H3N2)	Yes	Yes	Yes	NI	Centers for Disease Control and Prevention
A/Brazil/0020/2018	329847	A(H3N2)	Yes	Yes	Yes	NI	Centers for Disease Control and Prevention
A/Brazil/9555/2018	329846	A(H3N2)	Yes	Yes	Yes	NI	Centers for Disease Control and Prevention
A/Brazil/6279/2018	329835	A(H3N2)	Yes	Yes	Yes	NI	Centers for Disease Control and Prevention
A/Pernambuco/151608-IEC/2018	329823	A(H3N2)	Yes	Yes	Yes	PE	Centers for Disease Control and Prevention
A/Minas Gerais/444/2018	329821	A(H3N2)	Yes	Yes	Yes	MG	Centers for Disease Control and Prevention
A/Amazonas/152513-IEC/2018	329820	A(H3N2)	Yes	Yes	Yes	AM	Centers for Disease Control and Prevention
A/Para/151723-IEC/2018	328560	A(H3N2)	Yes	No	No	PA	Evandro Chagas Institute
A/Para/151642-IEC/2018	328559	A(H3N2)	Yes	No	No	PA	Evandro Chagas Institute
A/Pernambuco/151608-IEC/2018	328558	A(H3N2)	Yes	No	No	PE	Evandro Chagas Institute
A/Para/151778-IEC/2018	328557	A(H3N2)	Yes	No	No	PA	Evandro Chagas Institute
A/Pernambuco/151633-IEC/2018	328556	A(H3N2)	Yes	No	No	PE	Evandro Chagas Institute
A/Paraiba/151520-IEC/2018	328555	A(H3N2)	Yes	No	No	PB	Evandro Chagas Institute
A/Paraiba/152196-IEC/2018	328554	A(H3N2)	Yes	No	No	PB	Evandro Chagas Institute
A/Acre/152345-IEC/2018	328553	A(H3N2)	Yes	No	No	AC	Evandro Chagas Institute
A/Amazonas/152018-IEC/2018	328552	A(H3N2)	Yes	No	No	AM	Evandro Chagas Institute
A/Amazonas/152016-IEC/2018	328551	A(H3N2)	Yes	No	No	AM	Evandro Chagas Institute
A/Ceara/152548-IEC/2018	328549	A(H3N2)	Yes	No	No	CE	Evandro Chagas Institute
A/Paraiba/152256-IEC/2018	328547	A(H3N2)	Yes	No	No	PB	Evandro Chagas Institute
A/Paraiba/151837-IEC/2018	328546	A(H3N2)	Yes	No	No	PB	Evandro Chagas Institute
A/Para/153278-IEC/2018	328545	A(H3N2)	Yes	No	No	PA	Evandro Chagas Institute
A/Amapa/151957-IEC/2018	328544	A(H3N2)	Yes	No	No	AP	Evandro Chagas Institute
A/Amazonas/152017-IEC/2018	328543	A(H3N2)	Yes	No	No	AM	Evandro Chagas Institute
A/Acre/152577-IEC/2018	328542	A(H3N2)	Yes	No	No	AC	Evandro Chagas Institute
A/Ceara/152551-IEC/2018	328541	A(H3N2)	Yes	No	No	CE	Evandro Chagas Institute
A/Para/153282-IEC/2018	328540	A(H3N2)	Yes	No	No	PA	Evandro Chagas Institute
A/Ceara/152542-IEC/2018	328537	A(H3N2)	Yes	No	No	CE	Evandro Chagas Institute
A/Brazil/2299/2018	321963	A(H3N2)	Yes	Yes	Yes	NI	Centers for Disease Control and Prevention
A/Brazil/2391/2018	321957	A(H3N2)	Yes	Yes	Yes	NI	Centers for Disease Control and Prevention
A/Brazil/2313/2018	321956	A(H3N2)	Yes	Yes	Yes	NI	Centers for Disease Control and Prevention
A/Brazil/0593/2018	321930	A(H3N2)	Yes	Yes	Yes	NI	Centers for Disease Control and Prevention
A/Brazil/3223/2018	321929	A(H3N2)	Yes	Yes	Yes	NI	Centers for Disease Control and Prevention
A/Amazonas/152016-IEC/2018	321917	A(H3N2)	Yes	Yes	Yes	AM	Centers for Disease Control and Prevention
A/Brazil/6029/2018	321911	A(H1N1)pdm09	Yes	Yes	Yes	NI	Centers for Disease Control and Prevention
A/Brazil/0596/2018	321910	A(H3N2)	Yes	Yes	Yes	NI	Centers for Disease Control and Prevention
A/Para/153301-IEC/2018	321909	A(H3N2)	Yes	Yes	Yes	PA	Centers for Disease Control and Prevention
A/Amazonas/153154-IEC/2018	321890	A(H3N2)	Yes	Yes	Yes	AM	Centers for Disease Control and Prevention
A/Brazil/0282/2018	321862	A(H3N2)	Yes	Yes	Yes	NI	Centers for Disease Control and Prevention
A/Ceara/152548-IEC/2018	320320	A(H3N2)	Yes	Yes	Yes	CE	Centers for Disease Control and Prevention
A/Ceara/152536-IEC/2018	320319	A(H3N2)	Yes	Yes	Yes	CE	Centers for Disease Control and Prevention
A/Acre/152345-IEC/2018	320317	A(H3N2)	Yes	Yes	Yes	AC	Centers for Disease Control and Prevention
A/Amazonas/151285-IEC/2018	320314	A(H3N2)	Yes	Yes	Yes	AM	Centers for Disease Control and Prevention
A/Paraiba/152196-IEC/2018	320313	A(H3N2)	Yes	Yes	Yes	PB	Centers for Disease Control and Prevention
A/Amazonas/152016-IEC/2018	320312	A(H3N2)	Yes	Yes	Yes	AM	Centers for Disease Control and Prevention
A/Amapa/151957-IEC/2018	320311	A(H3N2)	Yes	Yes	Yes	AP	Centers for Disease Control and Prevention
A/Para/153301-IEC/2018	320309	A(H3N2)	Yes	Yes	Yes	PA	Centers for Disease Control and Prevention
A/Para/153278-IEC/2018	320308	A(H3N2)	Yes	Yes	Yes	PA	Centers for Disease Control and Prevention
A/Amazonas/153161-IEC/2018	320307	A(H3N2)	Yes	Yes	Yes	AM	Centers for Disease Control and Prevention
A/Amazonas/153154-IEC/2018	320306	A(H3N2)	Yes	Yes	Yes	AM	Centers for Disease Control and Prevention
A/Acre/152961-IEC/2018	320305	A(H3N2)	Yes	Yes	Yes	AC	Centers for Disease Control and Prevention
A/Acre/152563-IEC/2018	320233	A(H3N2)	Yes	Yes	Yes	AC	Centers for Disease Control and Prevention
A/Ceara/152545-IEC/2018	320232	A(H3N2)	Yes	Yes	Yes	CE	Centers for Disease Control and Prevention
A/Paraiba/152402-IEC/2018	320231	A(H3N2)	Yes	Yes	Yes	PB	Centers for Disease Control and Prevention
A/Acre/152338-IEC/2018	320230	A(H3N2)	Yes	Yes	Yes	AC	Centers for Disease Control and Prevention
A/Paraiba/152186-IEC/2018	320229	A(H3N2)	Yes	Yes	Yes	PB	Centers for Disease Control and Prevention
A/Acre/152155-IEC/2018	320228	A(H3N2)	Yes	Yes	Yes	AC	Centers for Disease Control and Prevention
A/Maranhao/152146-IEC/2018	320227	A(H3N2)	Yes	Yes	Yes	MA	Centers for Disease Control and Prevention
A/Paraiba/152911-IEC/2018	320226	A(H3N2)	Yes	Yes	Yes	PB	Centers for Disease Control and Prevention
A/Ceara/153529-IEC/2018	320225	A(H3N2)	Yes	Yes	Yes	CE	Centers for Disease Control and Prevention
A/Ceara/153525-IEC/2018	320224	A(H3N2)	Yes	Yes	Yes	CE	Centers for Disease Control and Prevention
A/Ceara/153518-IEC/2018	320223	A(H3N2)	Yes	Yes	Yes	CE	Centers for Disease Control and Prevention
A/Ceara/153517-IEC/2018	320222	A(H3N2)	Yes	Yes	Yes	CE	Centers for Disease Control and Prevention
A/Ceara/153516-IEC/2018	320221	A(H3N2)	Yes	Yes	Yes	CE	Centers for Disease Control and Prevention
A/Ceara/153515-IEC/2018	320220	A(H3N2)	Yes	Yes	Yes	CE	Centers for Disease Control and Prevention
A/Ceara/153514-IEC/2018	320219	A(H3N2)	Yes	Yes	Yes	CE	Centers for Disease Control and Prevention
A/Para/153282-IEC/2018	320218	A(H3N2)	Yes	Yes	Yes	PA	Centers for Disease Control and Prevention
A/Amazonas/153165-IEC/2018	320217	A(H3N2)	Yes	Yes	Yes	AM	Centers for Disease Control and Prevention
A/Acre/152954-IEC/2018	320216	A(H3N2)	Yes	Yes	Yes	AC	Centers for Disease Control and Prevention
A/Brazil/6359/2018	320200	A(H3N2)	Yes	Yes	Yes	NI	Centers for Disease Control and Prevention
A/Brazil/1469/2018	319844	A(H3N2)	Yes	Yes	Yes	NI	Centers for Disease Control and Prevention
A/Brazil/6406/2018	319843	A(H3N2)	Yes	Yes	Yes	NI	Centers for Disease Control and Prevention
A/Brazil/9363/2018	319842	A(H3N2)	Yes	Yes	Yes	NI	Centers for Disease Control and Prevention
A/Brazil/2817/2018	319841	A(H3N2)	Yes	Yes	Yes	NI	Centers for Disease Control and Prevention
A/Brazil/0596/2018	319717	A(H3N2)	Yes	Yes	Yes	NI	Centers for Disease Control and Prevention
A/Brazil/6356/2018	319713	A(H3N2)	Yes	Yes	Yes	NI	Centers for Disease Control and Prevention
A/Brazil/8260/2018	319707	A(H3N2)	Yes	Yes	Yes	NI	Centers for Disease Control and Prevention
A/Brazil/9331/2018	316451	A(H3N2)	Yes	Yes	Yes	NI	Centers for Disease Control and Prevention
A/Brazil/3864/2018	316435	A(H3N2)	Yes	Yes	Yes	NI	Centers for Disease Control and Prevention
A/Brazil/106/2018	316433	A(H3N2)	Yes	Yes	Yes	NI	Centers for Disease Control and Prevention
A/Bahia/107/2018	314038	A(H3N2)	Yes	Yes	No	BA	Centers for Disease Control and Prevention
A/Bahia/20/2018	314037	A(H3N2)	Yes	Yes	No	BA	Centers for Disease Control and Prevention
A/Minas Gerais/39/2018	314036	A(H3N2)	Yes	Yes	Yes	MG	Centers for Disease Control and Prevention
A/Bahia/122/2018	313577	A(H3N2)	Yes	Yes	Yes	BA	Centers for Disease Control and Prevention
A/Rio De Janeiro/233/2018	313576	A(H3N2)	Yes	Yes	Yes	RJ	Centers for Disease Control and Prevention
A/Sergipe/279/2018	313575	A(H3N2)	Yes	Yes	Yes	SE	Centers for Disease Control and Prevention
A/Santa Catarina/258/2018	313574	A(H3N2)	Yes	Yes	Yes	SC	Centers for Disease Control and Prevention
A/Alagoas/245/2018	313573	A(H3N2)	Yes	Yes	Yes	AL	Centers for Disease Control and Prevention
A/Bahia/117/2018	313572	A(H3N2)	Yes	Yes	Yes	BA	Centers for Disease Control and Prevention
A/Sergipe/221/2018	313571	A(H3N2)	Yes	Yes	Yes	SE	Centers for Disease Control and Prevention
A/Sergipe/215/2018	313570	A(H3N2)	Yes	Yes	Yes	SE	Centers for Disease Control and Prevention
A/Sergipe/214/2018	313569	A(H3N2)	Yes	Yes	Yes	SE	Centers for Disease Control and Prevention
A/Parana/155/2018	313568	A(H3N2)	Yes	Yes	Yes	PR	Centers for Disease Control and Prevention
A/Parana/154/2018	313567	A(H3N2)	Yes	Yes	Yes	PR	Centers for Disease Control and Prevention
A/Rio Grande Do Sul/103/2018	313555	A(H3N2)	Yes	Yes	Yes	RS	Centers for Disease Control and Prevention
A/Bahia/105/2018	313433	A(H3N2)	Yes	No	No	BA	Instituto Oswaldo Cruz FIOCRUZ - Laboratory of Respiratory Viruses and Measles (LVRS)
A/Rio de Janeiro/77/2018	306039	A(H3N2)	Yes	No	No	RJ	Instituto Oswaldo Cruz FIOCRUZ - Laboratory of Respiratory Viruses and Measles (LVRS)
A/Santa Catarina/82/2018	306038	A(H3N2)	Yes	No	No	SC	Instituto Oswaldo Cruz FIOCRUZ - Laboratory of Respiratory Viruses and Measles (LVRS)
A/Rio de Janeiro/78/2018	306035	A(H3N2)	Yes	No	No	RJ	Instituto Oswaldo Cruz FIOCRUZ - Laboratory of Respiratory Viruses and Measles (LVRS)
A/Rio de Janeiro/46/2018	306034	A(H3N2)	Yes	No	No	RJ	Instituto Oswaldo Cruz FIOCRUZ - Laboratory of Respiratory Viruses and Measles (LVRS)
A/Parana/92/2018	306032	A(H3N2)	Yes	No	No	PR	Instituto Oswaldo Cruz FIOCRUZ - Laboratory of Respiratory Viruses and Measles (LVRS)
A/Parana/91/2018	306031	A(H3N2)	Yes	No	No	PR	Instituto Oswaldo Cruz FIOCRUZ - Laboratory of Respiratory Viruses and Measles (LVRS)
A/Espirito Santo/86/2018	306023	A(H3N2)	Yes	No	No	ES	Instituto Oswaldo Cruz FIOCRUZ - Laboratory of Respiratory Viruses and Measles (LVRS)
A/Espirito Santo/85/2018	306022	A(H3N2)	Yes	No	No	ES	Instituto Oswaldo Cruz FIOCRUZ - Laboratory of Respiratory Viruses and Measles (LVRS)
A/Minas Gerais/39/2018	301373	A(H3N2)	Yes	No	No	MG	Instituto Oswaldo Cruz FIOCRUZ - Laboratory of Respiratory Viruses and Measles (LVRS)
A/Pernambuco/151633-IEC/2018	314562	A(H3N2)	Yes	No	No	PE	Evandro Chagas Institute
A/Pernambuco/151608-IEC/2018	314561	A(H3N2)	Yes	No	No	PE	Evandro Chagas Institute
A/Paraiba/151520-IEC/2018	314558	A(H3N2)	Yes	No	No	PB	Evandro Chagas Institute
A/Para/151778-IEC/2018	314557	A(H3N2)	Yes	No	No	PA	Evandro Chagas Institute
A/Para/151723-IEC/2018	314556	A(H3N2)	Yes	No	No	PA	Evandro Chagas Institute
A/Para/151642-IEC/2018	314555	A(H3N2)	Yes	No	No	PA	Evandro Chagas Institute
A/Parana/1158/2018	331572	A(H3N2)	Yes	Yes	Yes	PR	Centers for Disease Control and Prevention
A/Santa Catarina/1182/2018	331557	A(H3N2)	Yes	Yes	Yes	SC	Centers for Disease Control and Prevention
A/Parana/1074/2018	331192	A(H3N2)	No	Yes	No	PR	Centers for Disease Control and Prevention
A/Espirito Santo/1185/2018	330968	A(H3N2)	Yes	Yes	Yes	ES	Centers for Disease Control and Prevention
A/Parana/1168/2018	330967	A(H3N2)	Yes	Yes	Yes	PR	Centers for Disease Control and Prevention
A/Parana/1172/2018	330966	A(H3N2)	Yes	Yes	Yes	PR	Centers for Disease Control and Prevention
A/Santa Catarina/1007/2018	330965	A(H3N2)	Yes	Yes	Yes	SC	Centers for Disease Control and Prevention
A/Espirito Santo/739/2018	321303	A(H3N2)	Yes	Yes	Yes	ES	Centers for Disease Control and Prevention
A/Parana/763/2018	321302	A(H3N2)	Yes	Yes	Yes	PR	Centers for Disease Control and Prevention
A/Parana/768/2018	321301	A(H3N2)	Yes	Yes	Yes	PR	Centers for Disease Control and Prevention
A/Parana/772/2018	321300	A(H3N2)	Yes	Yes	Yes	PR	Centers for Disease Control and Prevention
A/Rio De Janeiro/821/2018	321299	A(H3N2)	Yes	Yes	Yes	RJ	Centers for Disease Control and Prevention
A/Rio De Janeiro/848/2018	321298	A(H3N2)	Yes	Yes	Yes	RJ	Centers for Disease Control and Prevention
A/Santa Catarina/865/2018	321297	A(H3N2)	Yes	Yes	Yes	SC	Centers for Disease Control and Prevention
A/Rio Grande Du Sul/503/2018	321296	A(H3N2)	Yes	Yes	Yes	RS	Centers for Disease Control and Prevention
A/Sergipe/527/2018	321295	A(H1N1)pdm09	Yes	No	No	SE	Centers for Disease Control and Prevention
A/Bahia/561/2018	321294	A(H1N1)pdm09	Yes	Yes	Yes	BA	Centers for Disease Control and Prevention
A/Bahia/564/2018	321293	A(H1N1)pdm09	Yes	Yes	Yes	BA	Centers for Disease Control and Prevention
A/Minas Gerias/716/2018	321292	A(H3N2)	Yes	Yes	Yes	MG	Centers for Disease Control and Prevention
A/Parana/762/2018	321249	A(H1N1)pdm09	Yes	Yes	Yes	PR	Centers for Disease Control and Prevention
A/Parana/817/2018	321248	A(H1N1)pdm09	Yes	Yes	Yes	PR	Centers for Disease Control and Prevention
A/Bahia/563/2018	321239	A(H1N1)pdm09	Yes	Yes	Yes	BA	Centers for Disease Control and Prevention
A/Alagoas/615/2018	321237	A(H3N2)	Yes	Yes	Yes	AL	Centers for Disease Control and Prevention
A/Rio De Janeiro/01/2018	304984	A(H3N2)	Yes	Yes	Yes	RJ	Centers for Disease Control and Prevention
A/Rio Grande Do Sul/27/2018	304983	A(H3N2)	Yes	Yes	No	RS	Centers for Disease Control and Prevention
A/Amazonas/151285-IEC/2018	330958	A(H3N2)	Yes	Yes	Yes	AM	Centers for Disease Control and Prevention
A/Brazil/4519/2018	333069	A(H3N2)	Yes	Yes	Yes	NI	Centers for Disease Control and Prevention
A/Brazil/9952/2018	333068	A(H3N2)	Yes	Yes	Yes	NI	Centers for Disease Control and Prevention
A/Brazil/4449/2018	333067	A(H3N2)	Yes	Yes	Yes	NI	Centers for Disease Control and Prevention
A/Brazil/1031/2018	333066	A(H3N2)	Yes	Yes	Yes	NI	Centers for Disease Control and Prevention
A/Brazil/4395/2018	333065	A(H3N2)	Yes	Yes	Yes	NI	Centers for Disease Control and Prevention
A/Brazil/4335/2018	333064	A(H1N1)pdm09	Yes	Yes	No	NI	Centers for Disease Control and Prevention
A/Brazil/823713/2018	333063	A(H1N1)pdm09	Yes	Yes	Yes	NI	Centers for Disease Control and Prevention
A/Brazil/8253/2018	333062	A(H1N1)pdm09	Yes	Yes	Yes	NI	Centers for Disease Control and Prevention
A/Brazil/0015/2018	333061	A(H1N1)pdm09	Yes	Yes	Yes	NI	Centers for Disease Control and Prevention
A/Brazil/0811/2018	331582	A(H3N2)	Yes	Yes	No	NI	Centers for Disease Control and Prevention
A/Brazil/8306/2018	331527	A(H3N2)	Yes	Yes	Yes	NI	Centers for Disease Control and Prevention
A/Brazil/5866/2018	330914	A(H3N2)	Yes	Yes	Yes	NI	Centers for Disease Control and Prevention
A/Brazil/4623/2018	330912	A(H1N1)pdm09	Yes	Yes	Yes	NI	Centers for Disease Control and Prevention
A/Brazil/4139/2018	330897	A(H3N2)	Yes	Yes	Yes	NI	Centers for Disease Control and Prevention
A/Brazil/1767/2018	322968	A(H3N2)	Yes	Yes	Yes	NI	Centers for Disease Control and Prevention
A/Brazil/5557/2018	322967	A(H3N2)	Yes	Yes	Yes	NI	Centers for Disease Control and Prevention
A/Brazil/7947/2018	322966	A(H1N1)pdm09	Yes	Yes	Yes	NI	Centers for Disease Control and Prevention
A/Brazil/0750/2018	322938	A(H1N1)pdm09	Yes	Yes	Yes	NI	Centers for Disease Control and Prevention
A/Brazil/1680/2018	322929	A(H3N2)	Yes	Yes	Yes	NI	Centers for Disease Control and Prevention
A/Brazil/4395/2018	322911	A(H3N2)	Yes	Yes	Yes	NI	Centers for Disease Control and Prevention
A/Brazil/3864/2018	321208	A(H3N2)	Yes	Yes	Yes	NI	Centers for Disease Control and Prevention
A/Brazil/3713/2018	320694	A(H3N2)	Yes	Yes	Yes	NI	Centers for Disease Control and Prevention
A/Brazil/3053/2018	316770	A(H3N2)	Yes	Yes	Yes	NI	Centers for Disease Control and Prevention
A/Brazil/0750/2018	316769	A(H3N2)	Yes	Yes	Yes	NI	Centers for Disease Control and Prevention
A/Brazil/1748/2018	316768	A(H3N2)	Yes	Yes	Yes	NI	Centers for Disease Control and Prevention
A/Brazil/128/2018	316767	A(H3N2)	Yes	Yes	Yes	NI	Centers for Disease Control and Prevention
A/Brazil/6029/2018	316766	A(H3N2)	Yes	Yes	Yes	NI	Centers for Disease Control and Prevention
A/Brazil/3169/2018	316749	A(H1N1)pdm09	Yes	Yes	Yes	NI	Centers for Disease Control and Prevention
A/Brazil/0344/2018	316748	A(H1N1)pdm09	Yes	Yes	Yes	NI	Centers for Disease Control and Prevention
A/Brazil/1438/2018	316746	A(H1N1)pdm09	Yes	Yes	Yes	NI	Centers for Disease Control and Prevention
A/Brazil/4428/2018	316745	A(H1N1)pdm09	Yes	Yes	Yes	NI	Centers for Disease Control and Prevention
A/Brazil/1644/2018	316744	A(H1N1)pdm09	Yes	Yes	Yes	NI	Centers for Disease Control and Prevention
A/Brazil/1524/2018	316741	A(H1N1)pdm09	Yes	Yes	Yes	NI	Centers for Disease Control and Prevention
A/Brazil/0561/2018	316740	A(H1N1)pdm09	Yes	Yes	Yes	NI	Centers for Disease Control and Prevention
A/Brazil/0280/2018	316738	A(H3N2)	Yes	Yes	Yes	NI	Centers for Disease Control and Prevention
A/Brazil/2135/2018	316737	A(H1N1)pdm09	Yes	Yes	Yes	NI	Centers for Disease Control and Prevention
A/Brazil/112/2018	316736	A(H3N2)	Yes	Yes	Yes	NI	Centers for Disease Control and Prevention
A/Brazil/6326/2018	316735	A(H3N2)	Yes	Yes	Yes	NI	Centers for Disease Control and Prevention
A/Bahia/106/2018	306365	A(H3N2)	Yes	No	No	BA	Instituto Oswaldo Cruz FIOCRUZ - Laboratory of Respiratory Viruses and Measles (LVRS)
A/Bahia/107/2018	306364	A(H3N2)	Yes	No	No	BA	Instituto Oswaldo Cruz FIOCRUZ - Laboratory of Respiratory Viruses and Measles (LVRS)
A/Bahia/108/2018	306363	A(H1N1)pdm09	Yes	No	No	BA	Instituto Oswaldo Cruz FIOCRUZ - Laboratory of Respiratory Viruses and Measles (LVRS)
A/Bahia/109/2018	306362	A(H3N2)	Yes	No	No	BA	Instituto Oswaldo Cruz FIOCRUZ - Laboratory of Respiratory Viruses and Measles (LVRS)
A/Bahia/125/2018	306361	A(H3N2)	Yes	No	No	BA	Instituto Oswaldo Cruz FIOCRUZ - Laboratory of Respiratory Viruses and Measles (LVRS)
A/Minas Gerais/202012676/2019	584046	A(H3N2)	Yes	Yes	Yes	MG	Centers for Disease Control and Prevention
A/Minas Gerais/202012675/2019	584016	A(H3N2)	Yes	Yes	Yes	MG	Centers for Disease Control and Prevention
A/Minas Gerais/202012673/2019	584015	A / H3	Yes	Yes	Yes	MG	Centers for Disease Control and Prevention
A/Minas Gerais/202012685/2019	584011	A(H1N1)pdm09	Yes	Yes	No	MG	Centers for Disease Control and Prevention
A/Minas Gerais/202012690/2019	584010	A(H1N1)pdm09	Yes	Yes	Yes	MG	Centers for Disease Control and Prevention
A/Minas Gerais/202012672/2019	584000	A(H1N1)pdm09	Yes	Yes	Yes	MG	Centers for Disease Control and Prevention
A/Minas Gerais/202012661/2019	583999	A(H1N1)pdm09	Yes	Yes	Yes	MG	Centers for Disease Control and Prevention
A/Minas Gerais/202012660/2019	583998	A(H1N1)pdm09	No	Yes	Yes	MG	Centers for Disease Control and Prevention
A/Minas Gerais/202012671/2019	583997	A(H1N1)pdm09	Yes	Yes	Yes	MG	Centers for Disease Control and Prevention
A/Parana/988/2019	516141	A(H1N1)pdm09	Yes	Yes	Yes	PR	Instituto Oswaldo Cruz FIOCRUZ - Laboratory of Respiratory Viruses and Measles (LVRS)
A/Rio Grande do Sul/1067/2019	516134	A(H1N1)pdm09	Yes	Yes	Yes	RS	Instituto Oswaldo Cruz FIOCRUZ - Laboratory of Respiratory Viruses and Measles (LVRS)
A/Santa Catarina/1127/2019	516116	A(H1N1)pdm09	Yes	Yes	Yes	SC	Instituto Oswaldo Cruz FIOCRUZ - Laboratory of Respiratory Viruses and Measles (LVRS)
A/Santa Catarina/1020/2019	516113	A(H1N1)pdm09	Yes	Yes	Yes	SC	Instituto Oswaldo Cruz FIOCRUZ - Laboratory of Respiratory Viruses and Measles (LVRS)
A/Santa Catarina/999/2019	516112	A(H1N1)pdm09	Yes	Yes	Yes	SC	Instituto Oswaldo Cruz FIOCRUZ - Laboratory of Respiratory Viruses and Measles (LVRS)
A/Santa Catarina/965/2019	516110	A(H1N1)pdm09	Yes	Yes	Yes	SC	Instituto Oswaldo Cruz FIOCRUZ - Laboratory of Respiratory Viruses and Measles (LVRS)
A/Santa Catarina/947/2019	516107	A(H1N1)pdm09	Yes	Yes	Yes	SC	Instituto Oswaldo Cruz FIOCRUZ - Laboratory of Respiratory Viruses and Measles (LVRS)
A/Santa Catarina/927/2019	516103	A(H3N2)	Yes	Yes	Yes	SC	Instituto Oswaldo Cruz FIOCRUZ - Laboratory of Respiratory Viruses and Measles (LVRS)
A/Alagoas/900/2019	491789	A(H1N1)pdm09	Yes	Yes	Yes	AL	Centers for Disease Control and Prevention
A/Rio Grande Do Sul/1071/2019	424675	A(H3N2)	Yes	Yes	Yes	RS	Centers for Disease Control and Prevention
A/Parana/1160/2019	424674	A(H3N2)	Yes	Yes	Yes	PR	Centers for Disease Control and Prevention
A/Bahia/1005/2019	418614	A(H3N2)	Yes	Yes	Yes	BA	Centers for Disease Control and Prevention
A/Espirito Santo/1156/2019	418613	A(H3N2)	Yes	Yes	Yes	ES	Centers for Disease Control and Prevention
A/Rio Grande Do Sul/1033/2019	418612	A(H1N1)pdm09	Yes	No	No	RS	Centers for Disease Control and Prevention
A/Rio Grande Do Sul/1036/2019	418611	A(H1N1)pdm09	Yes	Yes	Yes	RS	Centers for Disease Control and Prevention
A/Rio Grande Do Sul/1048/2019	418610	A(H1N1)pdm09	Yes	Yes	Yes	RS	Centers for Disease Control and Prevention
A/Rio Grande Do Sul/1050/2019	418609	A(H1N1)pdm09	Yes	Yes	Yes	RS	Centers for Disease Control and Prevention
A/Espirito Santo/1111/2019	418607	A(H1N1)pdm09	Yes	Yes	Yes	ES	Centers for Disease Control and Prevention
A/Rio Grande Do Sul/1084/2019	416815	A(H1N1)pdm09	Yes	Yes	Yes	RS	Centers for Disease Control and Prevention
A/Rio Grande Do Sul/1072/2019	416786	A(H1N1)pdm09	Yes	Yes	Yes	RS	Centers for Disease Control and Prevention
A/Para/159307-IEC/2019	410134	A(H1N1)pdm09	Yes	No	No	PA	Evandro Chagas Institute
A/Amazonas/158410-IEC/2019	410133	A(H1N1)pdm09	Yes	No	No	AM	Evandro Chagas Institute
A/Maranhao/158276-IEC/2019	410132	A(H1N1)pdm09	Yes	No	No	MA	Evandro Chagas Institute
A/Pernambuco/159540-IEC/2019	410111	A(H1N1)pdm09	Yes	No	No	PE	Evandro Chagas Institute
A/Acre/159202-IEC/2019	410110	A(H1N1)pdm09	Yes	No	No	AC	Evandro Chagas Institute
A/Pernambuco/158844-IEC/2019	410109	A(H3N2)	Yes	No	No	PE	Evandro Chagas Institute
A/Pernambuco/158623-IEC/2019	410108	A(H3N2)	Yes	No	No	PE	Evandro Chagas Institute
A/Marilia/1344855-IAL/2019	402514	A(H3N2)	Yes	Yes	Yes	SP	Centers for Disease Control and Prevention
A/Sorocaba/1314601-IAL/2019	402510	A(H3N2)	Yes	Yes	Yes	SP	Centers for Disease Control and Prevention
A/Ituverava/19180886-IAL/2019	402434	A(H3N2)	Yes	Yes	Yes	SP	Centers for Disease Control and Prevention
A/Espirito Santo/922/2019	398453	A(H3N2)	Yes	Yes	Yes	ES	Centers for Disease Control and Prevention
A/Espirito Santo/788/2019	398452	A(H3N2)	Yes	Yes	Yes	ES	Centers for Disease Control and Prevention
A/Espirito Santo/797/2019	398451	A(H3N2)	Yes	Yes	No	ES	Centers for Disease Control and Prevention
A/Santa Catarina/331/2019	398437	A(H3N2)	Yes	Yes	Yes	SC	Centers for Disease Control and Prevention
A/Rio Grande Do Sul/870/2019	398429	A(H3N2)	Yes	Yes	Yes	RS	Centers for Disease Control and Prevention
A/Parana/908/2019	398337	A(H3N2)	Yes	Yes	Yes	PR	Centers for Disease Control and Prevention
A/Rio De Janeiro/941/2019	398336	A(H3N2)	No	Yes	Yes	RJ	Centers for Disease Control and Prevention
A/Espirito Santo/504/2019	395492	A(H3N2)	Yes	Yes	Yes	ES	Centers for Disease Control and Prevention
A/Santa Catarina/706/2019	395469	A(H3N2)	Yes	Yes	Yes	SC	Centers for Disease Control and Prevention
A/Rio Grande Do Sul/653/2019	395468	A(H3N2)	Yes	Yes	Yes	RS	Centers for Disease Control and Prevention
A/Santa Catarina/731/2019	395422	A(H3N2)	Yes	Yes	Yes	SC	Centers for Disease Control and Prevention
A/Sao Paulo/1196204-IAL/2019	393804	A(H3N2)	Yes	Yes	Yes	SP	Centers for Disease Control and Prevention
A/Brazil/7127/2019	393608	A(H3N2)	Yes	Yes	Yes		Centers for Disease Control and Prevention
A/Sao Paulo/118344-IAL/2019	393607	A(H3N2)	Yes	Yes	Yes	SP	Centers for Disease Control and Prevention
A/Sao Paulo/1140710-IAL/2019	393605	A(H3N2)	Yes	Yes	Yes	SP	Centers for Disease Control and Prevention
A/Sao Paulo/1138678-IAL/2019	393578	A(H3N2)	Yes	Yes	Yes	SP	Centers for Disease Control and Prevention
A/Espirito Santo/510/2019	389491	A(H3N2)	Yes	No	No	ES	Instituto Oswaldo Cruz FIOCRUZ - Laboratory of Respiratory Viruses and Measles (LVRS)
A/Espirito Santo/503/2019	389490	A(H3N2)	Yes	No	No	ES	Instituto Oswaldo Cruz FIOCRUZ - Laboratory of Respiratory Viruses and Measles (LVRS)
A/Santa Catarina/495/2019	389489	A(H3N2)	Yes	No	No	SC	Instituto Oswaldo Cruz FIOCRUZ - Laboratory of Respiratory Viruses and Measles (LVRS)
A/Santa Catarina/494/2019	389488	A(H3N2)	Yes	No	No	SC	Instituto Oswaldo Cruz FIOCRUZ - Laboratory of Respiratory Viruses and Measles (LVRS)
A/Santa Catarina/491/2019	389487	A(H3N2)	Yes	No	No	SC	Instituto Oswaldo Cruz FIOCRUZ - Laboratory of Respiratory Viruses and Measles (LVRS)
A/Parana/435/2019	389485	A(H3N2)	Yes	No	No	PR	Instituto Oswaldo Cruz FIOCRUZ - Laboratory of Respiratory Viruses and Measles (LVRS)
A/Parana/410/2019	389484	A(H3N2)	Yes	No	No	PR	Instituto Oswaldo Cruz FIOCRUZ - Laboratory of Respiratory Viruses and Measles (LVRS)
A/Parana/402/2019	389483	A(H3N2)	Yes	No	No	PR	Instituto Oswaldo Cruz FIOCRUZ - Laboratory of Respiratory Viruses and Measles (LVRS)
A/Parana/394/2019	389482	A(H3N2)	Yes	No	No	PR	Instituto Oswaldo Cruz FIOCRUZ - Laboratory of Respiratory Viruses and Measles (LVRS)
A/Espirito Santo/377/2019	389481	A(H1N1)pdm09	Yes	No	No	ES	Instituto Oswaldo Cruz FIOCRUZ - Laboratory of Respiratory Viruses and Measles (LVRS)
A/Espirito Santo/376/2019	389480	A(H1N1)pdm09	Yes	No	No	ES	Instituto Oswaldo Cruz FIOCRUZ - Laboratory of Respiratory Viruses and Measles (LVRS)
A/Bahia/359/2019	389478	A(H3N2)	Yes	No	No	BA	Instituto Oswaldo Cruz FIOCRUZ - Laboratory of Respiratory Viruses and Measles (LVRS)
A/Bahia/346/2019	389477	A(H3N2)	Yes	No	No	BA	Instituto Oswaldo Cruz FIOCRUZ - Laboratory of Respiratory Viruses and Measles (LVRS)
A/Bahia/339/2019	389476	A(H3N2)	Yes	No	No	BA	Instituto Oswaldo Cruz FIOCRUZ - Laboratory of Respiratory Viruses and Measles (LVRS)
A/Rio Grande do Sul/308/2019	389472	A(H3N2)	Yes	No	No	RS	Instituto Oswaldo Cruz FIOCRUZ - Laboratory of Respiratory Viruses and Measles (LVRS)
A/Rio Grande do Sul/303/2019	389470	A(H3N2)	Yes	No	No	RS	Instituto Oswaldo Cruz FIOCRUZ - Laboratory of Respiratory Viruses and Measles (LVRS)
A/Rio Grande do Sul/296/2019	389468	A(H3N2)	Yes	No	No	RS	Instituto Oswaldo Cruz FIOCRUZ - Laboratory of Respiratory Viruses and Measles (LVRS)
A/Santa Catarina/278/2019	389467	A(H3N2)	Yes	No	No	SC	Instituto Oswaldo Cruz FIOCRUZ - Laboratory of Respiratory Viruses and Measles (LVRS)
A/Rio Grande do Sul/260/2019	389466	A(H3N2)	Yes	No	No	RS	Instituto Oswaldo Cruz FIOCRUZ - Laboratory of Respiratory Viruses and Measles (LVRS)
A/Parana/236/2019	389464	A(H3N2)	Yes	No	No	PR	Instituto Oswaldo Cruz FIOCRUZ - Laboratory of Respiratory Viruses and Measles (LVRS)
A/Santa Catarina/234/2019	389463	A(H3N2)	Yes	No	No	SC	Instituto Oswaldo Cruz FIOCRUZ - Laboratory of Respiratory Viruses and Measles (LVRS)
A/Santa Catarina/223/2019	389461	A(H3N2)	Yes	No	No	SC	Instituto Oswaldo Cruz FIOCRUZ - Laboratory of Respiratory Viruses and Measles (LVRS)
A/Santa Catarina/219/2019	389460	A(H3N2)	Yes	No	No	SC	Instituto Oswaldo Cruz FIOCRUZ - Laboratory of Respiratory Viruses and Measles (LVRS)
A/Santa Catarina/215/2019	389459	A(H3N2)	Yes	No	No	SC	Instituto Oswaldo Cruz FIOCRUZ - Laboratory of Respiratory Viruses and Measles (LVRS)
A/Santa Catarina/213/2019	389458	A(H3N2)	Yes	No	No	SC	Instituto Oswaldo Cruz FIOCRUZ - Laboratory of Respiratory Viruses and Measles (LVRS)
A/Parana/202/2019	389457	A(H3N2)	Yes	No	No	PR	Instituto Oswaldo Cruz FIOCRUZ - Laboratory of Respiratory Viruses and Measles (LVRS)
A/Bahia/161/2019	389456	A(H3N2)	Yes	No	No	BA	Instituto Oswaldo Cruz FIOCRUZ - Laboratory of Respiratory Viruses and Measles (LVRS)
A/Bahia/160/2019	389455	A(H3N2)	Yes	No	No	BA	Instituto Oswaldo Cruz FIOCRUZ - Laboratory of Respiratory Viruses and Measles (LVRS)
A/Espirito Santo/109/2019	389453	A(H3N2)	Yes	No	No	ES	Instituto Oswaldo Cruz FIOCRUZ - Laboratory of Respiratory Viruses and Measles (LVRS)
A/Espirito Santo/102/2019	389448	A(H3N2)	Yes	No	No	ES	Instituto Oswaldo Cruz FIOCRUZ - Laboratory of Respiratory Viruses and Measles (LVRS)
A/Espirito Santo/84/2019	389446	A(H3N2)	Yes	No	No	ES	Instituto Oswaldo Cruz FIOCRUZ - Laboratory of Respiratory Viruses and Measles (LVRS)
A/Santa Catarina/52/2019	389442	A(H3N2)	Yes	No	No	SC	Instituto Oswaldo Cruz FIOCRUZ - Laboratory of Respiratory Viruses and Measles (LVRS)
A/Bahia/342/2019	389424	A(H3N2)	Yes	No	No	BA	Instituto Oswaldo Cruz FIOCRUZ - Laboratory of Respiratory Viruses and Measles (LVRS)
A/Bahia/341/2019	389423	A(H3N2)	Yes	No	No	BA	Instituto Oswaldo Cruz FIOCRUZ - Laboratory of Respiratory Viruses and Measles (LVRS)
A/Rio Grande do Sul/320/2019	389422	A(H1N1)pdm09	Yes	No	No	RS	Instituto Oswaldo Cruz FIOCRUZ - Laboratory of Respiratory Viruses and Measles (LVRS)
A/Rio Grande do Sul/311/2019	389421	A(H1N1)pdm09	Yes	No	No	RS	Instituto Oswaldo Cruz FIOCRUZ - Laboratory of Respiratory Viruses and Measles (LVRS)
A/Rio Grande do Sul/301/2019	389420	A(H1N1)pdm09	Yes	No	No	RS	Instituto Oswaldo Cruz FIOCRUZ - Laboratory of Respiratory Viruses and Measles (LVRS)
A/Rio Grande do Sul/294/2019	389419	A(H1N1)pdm09	Yes	No	No	RS	Instituto Oswaldo Cruz FIOCRUZ - Laboratory of Respiratory Viruses and Measles (LVRS)
A/Santa Catarina/290/2019	389418	A(H1N1)pdm09	Yes	No	No	SC	Instituto Oswaldo Cruz FIOCRUZ - Laboratory of Respiratory Viruses and Measles (LVRS)
A/Rio de Janeiro/283/2019	389417	A(H1N1)pdm09	Yes	No	No	RJ	Instituto Oswaldo Cruz FIOCRUZ - Laboratory of Respiratory Viruses and Measles (LVRS)
A/Santa Catarina/277/2019	389416	A(H1N1)pdm09	Yes	No	No	SC	Instituto Oswaldo Cruz FIOCRUZ - Laboratory of Respiratory Viruses and Measles (LVRS)
A/Santa Catarina/274/2019	389415	A(H1N1)pdm09	Yes	No	No	SC	Instituto Oswaldo Cruz FIOCRUZ - Laboratory of Respiratory Viruses and Measles (LVRS)
A/Santa Catarina/273/2019	389414	A(H1N1)pdm09	Yes	No	No	SC	Instituto Oswaldo Cruz FIOCRUZ - Laboratory of Respiratory Viruses and Measles (LVRS)
A/Santa Catarina/272/2019	389413	A(H1N1)pdm09	Yes	No	No	SC	Instituto Oswaldo Cruz FIOCRUZ - Laboratory of Respiratory Viruses and Measles (LVRS)
A/Santa Catarina/271/2019	389412	A(H3N2)	Yes	No	No	SC	Instituto Oswaldo Cruz FIOCRUZ - Laboratory of Respiratory Viruses and Measles (LVRS)
A/Rio de Janeiro/262/2019	389410	A(H3N2)	Yes	No	No	RJ	Instituto Oswaldo Cruz FIOCRUZ - Laboratory of Respiratory Viruses and Measles (LVRS)
A/Rio Grande do Sul/258/2019	389409	A(H3N2)	Yes	No	No	RS	Instituto Oswaldo Cruz FIOCRUZ - Laboratory of Respiratory Viruses and Measles (LVRS)
A/Alagoas/255/2019	389408	A(H3N2)	Yes	No	No	AL	Instituto Oswaldo Cruz FIOCRUZ - Laboratory of Respiratory Viruses and Measles (LVRS)
A/Rio de Janeiro/239/2019	389407	A(H3N2)	Yes	No	No	RJ	Instituto Oswaldo Cruz FIOCRUZ - Laboratory of Respiratory Viruses and Measles (LVRS)
A/Santa Catarina/235/2019	389406	A(H3N2)	Yes	No	No	SC	Instituto Oswaldo Cruz FIOCRUZ - Laboratory of Respiratory Viruses and Measles (LVRS)
A/Santa Catarina/233/2019	389405	A(H3N2)	Yes	No	No	SC	Instituto Oswaldo Cruz FIOCRUZ - Laboratory of Respiratory Viruses and Measles (LVRS)
A/Santa Catarina/232/2019	389404	A(H3N2)	Yes	No	No	SC	Instituto Oswaldo Cruz FIOCRUZ - Laboratory of Respiratory Viruses and Measles (LVRS)
A/Santa Catarina/231/2019	389403	A(H3N2)	Yes	No	No	SC	Instituto Oswaldo Cruz FIOCRUZ - Laboratory of Respiratory Viruses and Measles (LVRS)
A/Santa Catarina/229/2019	389402	A(H3N2)	Yes	No	No	SC	Instituto Oswaldo Cruz FIOCRUZ - Laboratory of Respiratory Viruses and Measles (LVRS)
A/Santa Catarina/226/2019	389401	A(H3N2)	Yes	No	No	SC	Instituto Oswaldo Cruz FIOCRUZ - Laboratory of Respiratory Viruses and Measles (LVRS)
A/Santa Catarina/220/2019	389400	A(H3N2)	Yes	No	No	SC	Instituto Oswaldo Cruz FIOCRUZ - Laboratory of Respiratory Viruses and Measles (LVRS)
A/Santa Catarina/216/2019	389399	A(H3N2)	Yes	No	No	SC	Instituto Oswaldo Cruz FIOCRUZ - Laboratory of Respiratory Viruses and Measles (LVRS)
A/Santa Catarina/212/2019	389398	A(H3N2)	Yes	No	No	SC	Instituto Oswaldo Cruz FIOCRUZ - Laboratory of Respiratory Viruses and Measles (LVRS)
A/Parana/209/2019	389397	A(H3N2)	Yes	No	No	PR	Instituto Oswaldo Cruz FIOCRUZ - Laboratory of Respiratory Viruses and Measles (LVRS)
A/Parana/207/2019	389396	A(H3N2)	Yes	No	No	PR	Instituto Oswaldo Cruz FIOCRUZ - Laboratory of Respiratory Viruses and Measles (LVRS)
A/Parana/205/2019	389395	A(H3N2)	Yes	No	No	PR	Instituto Oswaldo Cruz FIOCRUZ - Laboratory of Respiratory Viruses and Measles (LVRS)
A/Parana/203/2019	389394	A(H1N1)pdm09	Yes	No	No	PR	Instituto Oswaldo Cruz FIOCRUZ - Laboratory of Respiratory Viruses and Measles (LVRS)
A/Espirito Santo/197/2019	389393	A(H1N1)pdm09	Yes	No	No	ES	Instituto Oswaldo Cruz FIOCRUZ - Laboratory of Respiratory Viruses and Measles (LVRS)
A/Espirito Santo/196/2019	389392	A(H1N1)pdm09	Yes	No	No	ES	Instituto Oswaldo Cruz FIOCRUZ - Laboratory of Respiratory Viruses and Measles (LVRS)
A/Parana/403/2019	377999	A(H1N1)pdm09	Yes	Yes	Yes	PR	Centers for Disease Control and Prevention
A/Parana/407/2019	377998	A(H1N1)pdm09	Yes	Yes	Yes	PR	Centers for Disease Control and Prevention
A/Parana/396/2019	377997	A(H1N1)pdm09	Yes	Yes	Yes	PR	Centers for Disease Control and Prevention
A/Parana/395/2019	377996	A(H1N1)pdm09	Yes	Yes	Yes	PR	Centers for Disease Control and Prevention
A/Espirito Santo/379/2019	377995	A(H1N1)pdm09	Yes	Yes	Yes	ES	Centers for Disease Control and Prevention
A/Amazonas/156442-IEC/2019	348399	A(H1N1)pdm09	Yes	No	No	AM	Evandro Chagas Institute
A/Amazonas/156180-IEC/2019	348391	A(H1N1)pdm09	Yes	No	No	AM	Evandro Chagas Institute
A/Amazonas/156063-IEC/2019	348389	A(H1N1)pdm09	Yes	No	No	AM	Evandro Chagas Institute
A/Amazonas/156054-IEC/2019	348387	A(H1N1)pdm09	Yes	No	No	AM	Evandro Chagas Institute
A/Amazonas/156070-IEC/2019	342394	A(H1N1)pdm09	Yes	No	No	AM	Evandro Chagas Institute
A/Amazonas/156069-IEC/2019	342393	A(H1N1)pdm09	Yes	No	No	AM	Evandro Chagas Institute
A/Amazonas/156053-IEC/2019	342391	A(H1N1)pdm09	Yes	No	No	AM	Evandro Chagas Institute
A/Amazonas/156048-IEC/2019	342390	A(H1N1)pdm09	Yes	No	No	AM	Evandro Chagas Institute
A/Amazonas/156046-IEC/2019	342389	A(H1N1)pdm09	Yes	No	No	AM	Evandro Chagas Institute
A/Amazonas/155813-IEC/2019	342388	A(H1N1)pdm09	Yes	No	No	AM	Evandro Chagas Institute
A/Sao Paulo/IAL/C1002/2019	6825361	A(H1N1)pdm09	Yes	Yes	Yes	SP	Instituto Adolfo Lutz
A/Sao Paulo/IAL/C1001/2019	6825358	A(H1N1)pdm09	Yes	Yes	Yes	SP	Instituto Adolfo Lutz
A/Sao Paulo/IAL/C1000/2020	6825321	A(H1N1)pdm09	Yes	Yes	Yes	SP	Instituto Adolfo Lutz
A/Sao Paulo/IAL/C1004/2019	6825320	A(H1N1)pdm09	Yes	Yes	Yes	SP	Instituto Adolfo Lutz
A/Sao Paulo/IAL/C1003/2019	6823670	A(H1N1)pdm09	Yes	Yes	Yes	SP	Instituto Adolfo Lutz
A/Brazil/RP_2019/2019	503627	A(H1N1)pdm09	Yes	No	No		NI
A/Bahia/151/2019	495510	A(H1N1)pdm09	Yes	Yes	Yes	BA	Centers for Disease Control and Prevention
A/Parana/991/2019	416929	A(H1N1)pdm09	Yes	Yes	Yes	PR	Centers for Disease Control and Prevention
A/Rio Grande Do Sul/1066/2019	416919	A(H3N2)	Yes	Yes	Yes	RS	Centers for Disease Control and Prevention
A/Rio Grande Do Sul/1080/2019	416918	A(H3N2)	Yes	Yes	Yes	RS	Centers for Disease Control and Prevention
A/Parana/1117/2019	416917	A(H3N2)	Yes	Yes	Yes	PR	Centers for Disease Control and Prevention
A/Santa Catarina/1168/2019	416916	A(H3N2)	Yes	Yes	Yes	SC	Centers for Disease Control and Prevention
A/Santa Catarina/1167/2019	416915	A(H3N2)	Yes	Yes	Yes	SC	Centers for Disease Control and Prevention
A/Santa Catarina/371/2019	413292	A(H3N2)	Yes	Yes	Yes	SC	Centers for Disease Control and Prevention
A/Rio Grande Do Sul/819/2019	397244	A(H3N2)	Yes	Yes	Yes	RS	Centers for Disease Control and Prevention
A/Bahia/745/2019	397213	A(H3N2)	Yes	Yes	No	BA	Centers for Disease Control and Prevention
A/Bahia/744/2019	397212	A(H3N2)	Yes	Yes	Yes	BA	Centers for Disease Control and Prevention
A/Bahia/736/2019	397211	A(H3N2)	Yes	Yes	Yes	BA	Centers for Disease Control and Prevention
A/Alagoas/579/2019	397207	A(H3N2)	No	Yes	Yes	AL	Centers for Disease Control and Prevention
A/Rio De Janeiro/146/2019	386882	A(H3N2)	Yes	Yes	No	RJ	Centers for Disease Control and Prevention
A/Espirito Santo/190/2019	378109	A(H3N2)	Yes	Yes	Yes	ES	Centers for Disease Control and Prevention
A/Alagoas/280/2019	378108	A(H3N2)	Yes	Yes	Yes	AL	Centers for Disease Control and Prevention
A/Espirito Santo/372/2019	378105	A(H3N2)	Yes	Yes	No	ES	Centers for Disease Control and Prevention
A/Parana/411/2019	378104	A(H3N2)	Yes	Yes	Yes	PR	Centers for Disease Control and Prevention
A/Espirito Santo/378/2019	378101	A(H3N2)	No	Yes	Yes	ES	Centers for Disease Control and Prevention
A/Rio Grande Do Sul/314/2019	378017	A(H3N2)	Yes	Yes	No	RS	Centers for Disease Control and Prevention
A/Santa Catarina/364/2019	378016	A(H3N2)	Yes	Yes	Yes	SC	Centers for Disease Control and Prevention
A/Parana/399/2019	378015	A(H3N2)	Yes	Yes	Yes	PR	Centers for Disease Control and Prevention
A/Bahia/345/2019	378008	A(H3N2)	Yes	Yes	Yes	BA	Centers for Disease Control and Prevention
A/Rio De Janeiro/165/2019	378007	A(H1N1)pdm09	Yes	Yes	Yes	RJ	Centers for Disease Control and Prevention
A/Parana/204/2019	378006	A(H1N1)pdm09	Yes	Yes	Yes	PR	Centers for Disease Control and Prevention
A/Santa Catarina/228/2019	378005	A(H1N1)pdm09	Yes	Yes	Yes	SC	Centers for Disease Control and Prevention
A/Rio Grande Do Sul/295/2019	378004	A(H1N1)pdm09	Yes	Yes	Yes	RS	Centers for Disease Control and Prevention
A/Santa Catarina/331/2019	378003	A(H1N1)pdm09	Yes	Yes	Yes	SC	Centers for Disease Control and Prevention
A/Bahia/340/2019	378002	A(H1N1)pdm09	Yes	Yes	Yes	BA	Centers for Disease Control and Prevention
A/Santa Catarina/368/2019	378001	A(H1N1)pdm09	Yes	Yes	Yes	SC	Centers for Disease Control and Prevention
A/Parana/425/2019	378000	A(H1N1)pdm09	Yes	Yes	Yes	PR	Centers for Disease Control and Prevention
A/Brazil/2605/2019	517732	A(H1N1)pdm09	Yes	Yes	Yes		Centers for Disease Control and Prevention
A/Sao Paulo/1343670-IAL/2019	402866	A(H1N1)pdm09	Yes	Yes	Yes	SP	Centers for Disease Control and Prevention
A/Quirinhos/1336719-IAL/2019	402865	A(H3N2)	Yes	Yes	Yes	SP	Centers for Disease Control and Prevention
A/Sao Paulo/1340253-IAL/2019	402864	A(H3N2)	Yes	Yes	Yes	SP	Centers for Disease Control and Prevention
A/Sao Paulo/1315119-IAL/2019	402863	A(H3N2)	Yes	Yes	Yes	SP	Centers for Disease Control and Prevention
A/Sao Paulo/1351322-IAL/2019	402862	A(H3N2)	Yes	Yes	Yes	SP	Centers for Disease Control and Prevention
A/Sao Paulo/1348050-IAL/2019	402861	A(H3N2)	Yes	Yes	Yes	SP	Centers for Disease Control and Prevention
A/Palmas/19017582-IAL/2019	402860	A(H3N2)	Yes	Yes	Yes	TO	Centers for Disease Control and Prevention
A/Sorocaba/1297278-IAL/2019	402859	A(H3N2)	Yes	Yes	Yes	SP	Centers for Disease Control and Prevention
A/Sao Paulo/1318447-IAL/2019	402784	A(H3N2)	Yes	Yes	Yes	SP	Centers for Disease Control and Prevention
A/Sao Paulo/1334848-IAL/2019	402782	A(H1N1)pdm09	Yes	Yes	Yes	SP	Centers for Disease Control and Prevention
A/Palmas/19019981-IAL/2019	402778	A(H1N1)pdm09	Yes	Yes	Yes	TO	Centers for Disease Control and Prevention
A/Palmas/19001930-IAL/2019	402717	A(H3N2)	Yes	Yes	Yes	TO	Centers for Disease Control and Prevention
A/Sao Paulo/1222219-IAL/2019	398976	A(H1N1)pdm09	Yes	Yes	Yes	SP	Centers for Disease Control and Prevention
A/Sao Paulo/1265906-IAL/2019	398944	A(H3N2)	Yes	Yes	Yes	SP	Centers for Disease Control and Prevention
A/Barueri/1216473-IAL/2019	398572	A(H3N2)	Yes	Yes	Yes	SP	Centers for Disease Control and Prevention
A/Sao Paulo/1201946-IAL/2019	398560	A(H3N2)	Yes	Yes	Yes	SP	Centers for Disease Control and Prevention
A/Sao Paulo/1198850-IAL/2019	395252	A(H3N2)	Yes	Yes	Yes	SP	Centers for Disease Control and Prevention
A/Brasilia/2068302-IAL/2019	395250	A(H3N2)	Yes	Yes	Yes	DF	Centers for Disease Control and Prevention
A/Goianesia/497545-IAL/2019	395248	A(H1N1)pdm09	Yes	Yes	Yes	GO	Centers for Disease Control and Prevention
A/Boituva/863604-IAL/2019	395247	A(H1N1)pdm09	Yes	Yes	Yes	SP	Centers for Disease Control and Prevention
A/Sao Paulo/1134057-IAL/2019	395245	A(H1N1)pdm09	Yes	Yes	Yes	SP	Centers for Disease Control and Prevention
A/Rio Claro/1209788-IAL/2019	395244	A(H1N1)pdm09	Yes	Yes	Yes	SP	Centers for Disease Control and Prevention
A/Sao Miguel Arcanjo/856758-IAL/2019	395242	A(H1N1)pdm09	Yes	Yes	Yes	SP	Centers for Disease Control and Prevention
A/Ituverava/1150437-IAL/2019	395241	A(H1N1)pdm09	Yes	Yes	Yes	SP	Centers for Disease Control and Prevention
A/Campinas/1175630-IAL/2019	395239	A(H1N1)pdm09	Yes	Yes	Yes	SP	Centers for Disease Control and Prevention
A/Campinas/1163387-IAL/2019	394983	A(H1N1)pdm09	Yes	Yes	Yes	SP	Centers for Disease Control and Prevention
A/Aquidauana/584062-IAL/2019	394969	A(H1N1)pdm09	No	Yes	Yes	SP	Centers for Disease Control and Prevention
A/Mato Grosso Do Sul/589354-IAL/2019	392619	A(H1N1)pdm09	Yes	Yes	Yes	MS	Centers for Disease Control and Prevention
A/Agua Clara/589480-IAL/2019	392617	A(H1N1)pdm09	Yes	Yes	Yes	MS	Centers for Disease Control and Prevention
A/Brasilia/70277702-IAL/2019	392615	A(H3N2)	Yes	Yes	Yes	DF	Centers for Disease Control and Prevention
A/Goiania/496969-IAL/2019	392613	A(H3N2)	Yes	Yes	Yes	GO	Centers for Disease Control and Prevention
A/Americana/1164820-IAL/2019	392612	A(H3N2)	Yes	Yes	Yes	SP	Centers for Disease Control and Prevention
A/Campo Grande/2010884-IAL/2019	392611	A(H3N2)	Yes	Yes	Yes	MS	Centers for Disease Control and Prevention
A/Tres Lagoas/581564-IAL/2019	392610	A(H3N2)	No	No	Yes	MS	Centers for Disease Control and Prevention
A/Porto Velho/125-IAL/2019	392609	A(H3N2)	Yes	Yes	Yes	RO	Centers for Disease Control and Prevention
A/Sao Paulo/1185978-IAL/2019	392608	A(H3N2)	Yes	Yes	Yes	SP	Centers for Disease Control and Prevention
A/Laranjal Paulista/859963-IAL/2019	392607	A(H3N2)	Yes	Yes	Yes	SP	Centers for Disease Control and Prevention
A/Campo Grande/589557-IAL/2019	392606	A(H3N2)	Yes	Yes	Yes	MS	Centers for Disease Control and Prevention
A/Brasilandia/587721-IAL/2019	392605	A(H3N2)	Yes	Yes	Yes	MS	Centers for Disease Control and Prevention
A/Maracaju/867540-IAL/2019	392604	A(H3N2)	Yes	Yes	Yes	MS	Centers for Disease Control and Prevention
A/Mato Grosso Do Sul/400314-IAL/2019	392603	A(H3N2)	Yes	Yes	Yes	MS	Centers for Disease Control and Prevention
A/Mato Grosso Do Sul/590169-IAL/2019	392602	A(H3N2)	Yes	Yes	Yes	MS	Centers for Disease Control and Prevention
A/Brasilandia/589135-IAL/2019	392601	A(H3N2)	Yes	Yes	Yes	MS	Centers for Disease Control and Prevention
A/Goias/493857-IAL/2019	392600	A(H3N2)	Yes	Yes	Yes	GO	Centers for Disease Control and Prevention
A/Sao Paulo/854359-IAL/2019	392599	A(H3N2)	Yes	Yes	Yes	SP	Centers for Disease Control and Prevention
A/Goias/4901029-IAL/2019	392598	A(H3N2)	Yes	Yes	Yes	GO	Centers for Disease Control and Prevention
A/Sao Paulo/1216366-IAL/2019	392597	A(H3N2)	Yes	Yes	Yes	SP	Centers for Disease Control and Prevention
A/Ribeirao Preto/1180890-IAL/2019	392595	A(H3N2)	Yes	Yes	Yes	SP	Centers for Disease Control and Prevention
A/Ribeirao Preto/1183721-IAL/2019	392594	A(H3N2)	Yes	Yes	Yes	SP	Centers for Disease Control and Prevention
A/Tres Lagoas/585135-IAL/2019	392591	A(H3N2)	Yes	Yes	Yes	MS	Centers for Disease Control and Prevention
A/Mogi Das Cruzes/1218859-IAL/2019	392588	A(H3N2)	Yes	Yes	Yes	SP	Centers for Disease Control and Prevention
A/Ituverava/1150437-IAL/2019	392587	A(H3N2)	Yes	Yes	Yes	SP	Centers for Disease Control and Prevention
A/Anapolis/487395-IAL/2019	392567	A(H3N2)	Yes	Yes	Yes	GO	Centers for Disease Control and Prevention
A/Brasilia/2068302-IAL/2019	392548	A(H3N2)	Yes	Yes	Yes	DF	Centers for Disease Control and Prevention
A/Sao Paulo/1134057-IAL/2019	392547	A(H3N2)	Yes	Yes	Yes	SP	Centers for Disease Control and Prevention
A/Goianesia/497545-IAL/2019	392546	A(H3N2)	Yes	Yes	Yes	GO	Centers for Disease Control and Prevention
A/Brasilandia/588973-IAL/2019	392545	A(H3N2)	Yes	Yes	Yes	MS	Centers for Disease Control and Prevention
A/Campinas/1165167-IAL/2019	392544	A(H3N2)	Yes	Yes	Yes	SP	Centers for Disease Control and Prevention
A/Campinas/1175630-IAL/2019	392543	A(H3N2)	Yes	Yes	Yes	SP	Centers for Disease Control and Prevention
A/Boituva/863604-IAL/2019	392542	A(H3N2)	Yes	Yes	Yes	SP	Centers for Disease Control and Prevention
A/Sao Paulo/1265906-IAL/2019	392541	A(H3N2)	Yes	Yes	Yes	SP	Centers for Disease Control and Prevention
A/Sao Miguel Arcanjo/856758-IAL/2019	392540	A(H3N2)	Yes	Yes	Yes	SP	Centers for Disease Control and Prevention
A/Ribeirao Preto/1176210-IAL/2019	392539	A(H3N2)	Yes	Yes	No	SP	Centers for Disease Control and Prevention
A/Porto Velho/144-IAL/2019	392538	A(H1N1)pdm09	No	Yes	Yes	RO	Centers for Disease Control and Prevention
A/Sao Paulo/1222219-IAL/2019	392537	A(H1N1)pdm09	Yes	Yes	Yes	SP	Centers for Disease Control and Prevention
A/Sao Paulo/1218374-IAL/2019	392536	A(H1N1)pdm09	Yes	Yes	Yes	SP	Centers for Disease Control and Prevention
A/Barueri/1216473-IAL/2019	392535	A(H1N1)pdm09	Yes	Yes	Yes	SP	Centers for Disease Control and Prevention
A/Rio Claro/1209788-IAL/2019	392534	A(H1N1)pdm09	Yes	Yes	Yes	SP	Centers for Disease Control and Prevention
A/Pariquera-Acu/1199649-IAL/2019	392533	A(H3N2)	Yes	Yes	Yes	SP	Centers for Disease Control and Prevention
A/Sao Paulo/1201946-IAL/2019	392532	A(H3N2)	Yes	Yes	Yes	SP	Centers for Disease Control and Prevention
A/Campo Grande/2010891-IAL/2019	392530	A(H3N2)	Yes	Yes	Yes	MS	Centers for Disease Control and Prevention
A/Sao Paulo/1198850-IAL/2019	392527	A(H3N2)	Yes	Yes	Yes	SP	Centers for Disease Control and Prevention
A/Rio de Janeiro/1027/2019	516093	A(H3N2)	Yes	Yes	Yes	RJ	Instituto Oswaldo Cruz FIOCRUZ - Laboratory of Respiratory Viruses and Measles (LVRS)
